# Supplementary material for: HuR-Regulated mRNAs Associated with Nuclear hnRNP A1-RNP Complexes
Source: MDPI journal article supplement (doi:10.3390/ijms141020256), 2013-10-11
Supplement: s2 [file s2]

## Sheet: DELNucExTotal_WTvsKO_FDRStorey0
Symbol	Definition	p-value	Fold Change
Pitx2	paired-like homeodomain transcription factor 2 (Pitx2), transcript variant 2	0.00502584	90.02
Psmd8	proteasome (prosome, macropain) 26S subunit, non-ATPase, 8 (Psmd8)	7.2657e-05	53.4456
GM15698	predicted gene,transcription elongation factor B (SIII), polypeptide 2, non-coding RNA	0.00362531	22.506
Glrx1	glutaredoxin	0.000801474	21.4068
Parm1	prostate androgen-regulated mucin-like protein 1	4.0169e-05	21.0114
Gfpt1	glutamine fructose-6-phosphate transaminase 1	0.000501214	17.0693
Crlf1	cytokine receptor-like factor 1	0.000411207	15.102
Thumpd1	THUMP domain containing 1 (Thumpd1)	1.7948e-05	13.4233
Sorbs2	sorbin and SH3 domain containing 2 (Sorbs2)	0.00297865	12.6407
Mef2c	myocyte enhancer factor 2C (Mef2c).	0.00550536	12.3519
Timmdc1	translocase of inner mitochondrial membrane domain containing 1	0.00129978	12.2393
Fmo1	flavin containing monooxygenase 1 (Fmo1)	0.00263851	11.4452
Cdh3	cadherin 13 (Cdh13)	0.00107383	10.9283
Sema3f	sema domain, immunoglobulin domain (Ig), short basic domain, secreted, (semaphorin) 3F (Sema3f)	0.00288646	10.7097
Gspt2	G1 to S phase transition 2 (Gspt2)	0.000122701	9.10505
Tia1		0.00351233	8.35902
Tcfcp2l1	transcription factor CP2-like 1 (Tcfcp2l1)	0.000744796	8.33973
Hnf1b	HNF1 homeobox B (Hnf1b)	0.00180983	8.24127
Tcfap2a	transcription factor AP-2, alpha (Tcfap2a)	0.00450752	7.88075
Lama5	laminin, alpha 5 (Lama5)	0.00194765	7.42985
Fhl1	four and a half LIM domains 1 (Fhl1), transcript variant 1	0.00464562	7.40415
Sfrs16		0.000291612	7.29378
Shroom2	shroom family member 2 (Shroom2)	0.00274828	7.19336
Cirbp	cysteine dioxygenase 1, cytosolic (Cdo1)	0.00490957	6.94833
E430013K19Rik		0.000140085	6.87646
6720422M22Rik		0.0026909	6.84476
Serpinb1a	serine (or cysteine) peptidase inhibitor, clade B, member 1a (Serpinb1a)	0.00521075	6.6499
Mid2	midline 2 (Mid2).	0.000476387	6.37165
Rcan2	regulator of calcineurin 2 (Rcan2), transcript variant 1.	0.00104251	6.23659
Nrp		0.00179507	6.23332
Ldb2	LIM domain binding 2 (Ldb2), transcript variant 2.	0.00101405	6.19252
4933427D14Rik	RIKEN cDNA 4933427D14 gene (4933427D14Rik).	0.0014643	5.95871
Tinagl	tubulointerstitial nephritis antigen-like (Tinagl)	0.00511473	5.70279
Nicn1	nicolin 1 (Nicn1)	0.000127314	5.6962
Mks1	Meckel syndrome, type 1 (Mks1). XM_921744	0.00011062	5.68305
Moxd1	monooxygenase, DBH-like 1 (Moxd1)	0.00457094	5.64458
Thsd7b	thrombospondin, type I, domain containing 7B (Thsd7b)	0.00301179	5.5661
Adh1	alcohol dehydrogenase 1 (class I) (Adh1)	0.00304017	5.41581
A730054J21Rik		0.00201823	5.40764
Slc14a1	solute carrier family 14 (urea transporter), member 1 (Slc14a1)	0.00069003	5.33319
Col4a2	procollagen, type IV, alpha 1 (Col4a1)	0.00380808	5.02225
Satb1	special AT-rich sequence binding protein 1 (Satb1)	0.000532535	4.82881
Nkd2	naked cuticle 2 homolog (Drosophila) (Nkd2)	0.000646356	4.68592
Tinagl1	tubulointerstitial nephritis antigen-like 1 (Tinagl1)	0.00131226	4.66971
9030617O03Rik	RIKEN cDNA 9030617O03 gene (9030617O03Rik).	0.000237234	4.61608
Nrp1	neuropilin 1 (Nrp1).	0.00152146	4.60146
Cdo1	cadherin 3 (Cdh3), transcript variant 1.	0.000799426	4.51586
Ephx1	epoxide hydrolase 1, microsomal (Ephx1).	0.00135365	4.45883
9930105H17Rik		0.00223741	4.36707
Ahi1	Abelson helper integration site (Ahi1).	0.000145079	4.27226
Nudt19	nudix (nucleoside diphosphate linked moiety X)-type motif 19 (Nudt19)	0.00475583	4.26733
scl0001163.1_8		0.00559211	4.23785
AI646023	expressed sequence AI646023 (AI646023)	3.851e-05	4.21344
D130046C19Rik		0.00383161	4.20858
Nubp2	nucleotide binding protein 2 (Nubp2).	0.00308784	4.20858
Mtap2		0.00550044	4.10296
Tgfb3	transforming growth factor, beta 3 (Tgfb3).	0.0014144	4.08877
Ppargc1a	peroxisome proliferative activated receptor, gamma, coactivator 1 alpha (Ppargc1a).	0.0033387	4.06053
Gria3	glutamate receptor, ionotropic, AMPA3 (alpha 3) (Gria3).	0.000528661	4.03792
Adamtsl3	PREDICTED: ADAMTS-like 3 (Adamtsl3).	7.0016e-05	4.03714
Zfp87	zinc finger protein 87 (Zfp87).	3.3319e-05	4.03248
E330020G21Rik		0.00487758	4.02317
Itpripl2	inositol 1,4,5-triphosphate receptor interacting protein-like 2 (Itpripl2)	0.0035271	4
Clcn7	Cbp/p300-interacting transactivator, with Glu/Asp-rich carboxy-terminal domain, 2 (Cited2)	0.00345825	3.98616
Myh10	myosin, heavy polypeptide 10, non-muscle (Myh10)	7.7168e-05	3.97696
2410014A08Rik	RIKEN cDNA 2410014A08 gene (2410014A08Rik)	0.00397572	3.95406
Llgl2	lethal giant larvae homolog 2 (Drosophila) (Llgl2)	0.00162642	3.92221
Osr1	odd-skipped related 1 (Drosophila) (Osr1)	0.00113469	3.90413
Peg13	paternally expressed 13 (Peg13), non-coding RNA	0.00100762	3.90413
D430013K02		0.00179744	3.89962
Hoxa5		0.000467722	3.81937
Lims2	LIM and senescent cell antigen like domains 2 (Lims2)	0.00228502	3.80615
Col8a1	collagen, type IV, alpha 2 (Col4a2)	0.00347753	3.77114
Mrps12	mitochondrial ribosomal protein S12 (Mrps12)	0.00433759	3.76072
Cxadr		0.00380186	3.74942
E530017G24Rik		0.000578755	3.73213
Sytl2	synaptotagmin-like 2 (Sytl2), transcript variant 5.	0.0048008	3.69353
Pitpnm2	phosphatidylinositol transfer protein, membrane-associated 2 (Pitpnm2).	0.000526135	3.68075
Hoxb3	homeo box B3 (Hoxb3), transcript variant 2.	0.00146544	3.6765
Zfp703	PREDICTED: zinc finger protein 703 (Zfp703).	0.00196079	3.50237
Epb4.1l4b	PREDICTED: erythrocyte protein band 4.1-like 4b, transcript variant 2 (Epb4.1l4b).	0.00270711	3.45017
Pard6g	par-6 partitioning defective 6 homolog gamma (C. elegans) (Pard6g).	0.00333528	3.37526
6430578G21Rik		0.00231877	3.36747
4833431P16Rik		0.00250246	3.3597
Dcxr	dicarbonyl L-xylulose reductase (Dcxr).	0.0015222	3.35195
Tnfrsf21	tumor necrosis factor receptor superfamily, member 21 (Tnfrsf21).	0.00497861	3.29817
D030022P06Rik	PREDICTED: RIKEN cDNA D030022P06 gene (D030022P06Rik).	0.000467508	3.29056
Fahd2a	fumarylacetoacetate hydrolase domain containing 2A (Fahd2a).	0.000520023	3.28676
Pgls		0.000943492	3.28676
6720485J18Rik		0.00393829	3.27539
Fbxo46	F-box protein 46 (Fbxo46).	0.00369417	3.25653
Gpc6		0.00426073	3.25653
Kif26b	kinesin family member 26B (Kif26b).	0.00154207	3.23777
Tinag	tubulointerstitial nephritis antigen (Tinag).	0.00260973	3.23403
Msi2h		3.02631e-05	3.20862
Mical2	microtubule associated monoxygenase, calponin and LIM domain containing 2 (Mical2).	0.00175824	3.20428
Ephb6	Eph receptor B6 (Ephb6).	0.00314621	3.19688
BC004044	cDNA sequence BC004044 (BC004044).	0.00299027	3.16017
BC032265	cDNA sequence BC032265 (BC032265).	0.00214935	3.1456
A730040I05Rik		0.000630962	3.13471
Myom1	myomesin 1 (Myom1), transcript variant 1.	0.00253435	3.13266
Kcne4	potassium voltage-gated channel, Isk-related subfamily, gene 4 (Kcne4).	0.00190893	3.11306
B230312I18Rik	PREDICTED: RIKEN cDNA B230312I18 gene, transcript variant 3 (B230312I18Rik).	0.00297017	3.08799
C030013C21Rik		8.7033e-05	3.08442
Trim7		0.00431054	3.08086
Fgfrl1	fibroblast growth factor receptor-like 1 (Fgfrl1).	0.00138893	3.0702
Inha	inhibin alpha (Inha).	0.00264055	3.04899
Adamts9		0.00570828	3.03494
Samd5	sterile alpha motif domain containing 5 (Samd5).	0.0017676	3.03143
D130017D19Rik		0.00301731	3.00008
Foxn3	forkhead box N3 (Foxn3).	0.000834579	2.98625
Trappc2l	trafficking protein particle complex 2-like (Trappc2l).	0.000407003	2.9622
C030045D06Rik	RIKEN cDNA C030045D06 gene (C030045D06Rik).	0.000245362	2.95536
D630024O03Rik		0.00501678	2.91804
Sbk		0.00480931	2.91131
Txnip	thioredoxin interacting protein (Txnip), transcript variant 2.	0.000586925	2.88383
Nt5c3	5'-nucleotidase, cytosolic III (Nt5c3).	0.00410197	2.88119
6720418B01Rik	PREDICTED: RIKEN cDNA 6720418B01 gene (6720418B01Rik).	0.001124	2.87787
Hist1h4f	histone cluster 1, H4f (Hist1h4f).	0.00326522	2.87787
Alkbh6	alkB, alkylation repair homolog 6 (E. coli) (Alkbh6).	0.00534951	2.83825
Tceal5	TCEAL5 transcription elongation factor A (SII)-like 5	0.0362943	2.8317
2900045G02Rik		0.000669776	2.82516
Sh3md4	SH3 multiple domains 4 (Sh3md4)	0.000999616	2.8219
Slc17a5	solute carrier family 17 (anion/sugar transporter), member 5 (Slc17a5)	0.00115456	2.79594
Sccpdh	saccharopine dehydrogenase (putative) (Sccpdh)	0.000340783	2.79271
Il4i1	interleukin 4 induced 1 (Il4i1)	0.00280701	2.77984
Vrk1	vaccinia related kinase 1 (Vrk1), transcript variant 2	0.00556227	2.77984
6030400N17Rik		0.00264783	2.76702
Ppp1r3c	protein phosphatase 1, regulatory (inhibitor) subunit 3C (Ppp1r3c)	0.000191961	2.76702
5530400B01Rik		0.00208759	2.76063
Cited2	cold inducible RNA binding protein (Cirbp)	0.000867514	2.74157
A130022A09Rik		0.00078259	2.73208
Klhdc4	kelch domain containing 4 (Klhdc4)	0.000379689	2.73208
Appl2	adaptor protein, phosphotyrosine interaction, PH domain and leucine zipper containing 2 (Appl2)	0.00171369	2.71321
Fat1	FAT tumor suppressor homolog 1 (Drosophila) (Fat1)	0.00211798	2.71321
Prr14	proline rich 14 (Prr14)	0.00064299	2.7007
Sorbs1	sorbin and SH3 domain containing 1 (Sorbs1), transcript variant 5	0.00489731	2.67586
Polr2l	PREDICTED: polymerase (RNA) II (DNA directed) polypeptide L (Polr2l)	0.00322601	2.66968
Dos	downstream of Stk11 (Dos)	0.00338001	2.6673
Tax1bp3	Tax1 (human T-cell leukemia virus type I) binding protein 3 (Tax1bp3)	0.00014306	2.65737
Sync	syncoilin (Sync)	0.000925291	2.65124
E030038K17Rik		0.00417305	2.64818
Gpr172b	G protein-coupled receptor 172B (Gpr172b)	4.92968e-05	2.64818
F2rl1		0.00468351	2.63912
scl000416.1_19		0.00156385	2.63902
Tbc1d9	TBC1 domain family, member 9 (Tbc1d9)	0.000853883	2.62382
Rnf113a2	ring finger protein 113A2 (Rnf113a2).	0.00544938	2.6087
Cpz	coenzyme Q10 homolog A (yeast) (Coq10a).	0.00445103	2.60569
Glo1	glyoxalase 1 (Glo1).	0.0041198	2.59068
Rbm12	RNA binding motif protein 12 (Rbm12), transcript variant 2.	0.000872357	2.59068
Ugp2	UDP-glucose pyrophosphorylase 2 (Ugp2).	0.000901853	2.57576
BC050811	cDNA sequence BC050811 (BC050811).	0.00475988	2.56982
C130023A14Rik	RIKEN cDNA C030045D06 gene (C030045D06Rik).	0.000195114	2.56982
Btbd6		0.000891318	2.56753
Igf1r	insulin-like growth factor I receptor (Igf1r).	0.000817887	2.56389
Pcdhb7	protocadherin beta 7 (Pcdhb7).	0.00261763	2.56389
Msi2	Musashi homolog 2 (Drosophila) (Msi2).	0.00572547	2.55207
Macrod1	MACRO domain containing 1 (Macrod1).	0.00484228	2.5403
Klc2	kinesin light chain 2 (Klc2).	0.00345569	2.53609
Fert2	fer (fms/fps related) protein kinase, testis specific 2 (Fert2), transcript variant 1.	0.00122526	2.53444
6720427H10Rik		0.00583129	2.51403
Gas8		0.000344496	2.51403
Lrrc28	leucine rich repeat containing 28 (Lrrc28).	0.000447629	2.50822
2900057K09Rik		0.000284868	2.50533
Itga1	integrin alpha 1 (Itga1).	0.00112792	2.50533
Smpd1	sphingomyelin phosphodiesterase 1, acid lysosomal (Smpd1).	0.00186937	2.50533
Spire2	spire homolog 2 (Drosophila) (Spire2).	0.00320815	2.4909
2310010B21Rik		0.00512337	2.47084
9630025I21Rik	RIKEN cDNA 9630025I21 gene (9630025I21Rik).	0.000149852	2.47084
Gfer	growth factor, erv1 (S. cerevisiae)-like (augmenter of liver regeneration) (Gfer).	0.00117392	2.46229
9930004G02Rik		0.00570655	2.45661
Arhgef18	rho/rac guanine nucleotide exchange factor (GEF) 18 (Arhgef18).	0.00539942	2.45377
Mppe1	metallophosphoesterase 1 (Mppe1). XM_001001219	0.00600294	2.45377
Afap1	actin filament associated protein 1 (Afap1).	0.00548456	2.44246
Klhl26	kelch-like 26 (Drosophila) (Klhl26), transcript variant 1.	0.00138099	2.44246
Trib2		0.00122195	2.43964
Sat2	spermidine/spermine N1-acetyl transferase 2 (Sat2). XM_181304 XM_901865 XM_901869 XM_901870	0.00307343	2.43682
Cd109	cyclin G1 (Ccng1).	0.00175904	2.43401
0610025P10Rik	RIKEN cDNA 0610025P10 gene (0610025P10Rik).	0.000288007	2.4312
Dmwd	dystrophia myotonica-containing WD repeat motif (Dmwd).	0.000521393	2.42519
Rab31	RAB31, member RAS oncogene family (Rab31).	0.00240935	2.40605
Irf2bp1	interferon regulatory factor 2 binding protein 1 (Irf2bp1)	0.00448898	2.39773
Irf3		0.00117437	2.39646
Ccl5	coiled-coil domain containing 124 (Ccdc124)	0.000712221	2.38943
Sh3rf1	SH3 domain containing ring finger 1 (Sh3rf1)	0.00157398	2.37841
2210414H16Rik		0.0053132	2.37293
2610003J06Rik	RIKEN cDNA 2610003J06 gene (2610003J06Rik).	0.000541143	2.3511
Lrba	LPS-responsive beige-like anchor (Lrba), transcript variant 1.	6.18606e-05	2.3511
Map3k1	mitogen-activated protein kinase kinase kinase 1 (Map3k1)	0.00540507	2.3511
AI662250	expressed sequence AI662250 (AI662250).	0.000902973	2.34838
Trpt1	tRNA phosphotransferase 1 (Trpt1).	0.00245955	2.34732
Stk39	serine/threonine kinase 39, STE20/SPS1 homolog (yeast) (Stk39)	0.00234984	2.34296
Gde1	glycerophosphodiester phosphodiesterase 1 (Gde1).	0.00210693	2.33755
Galnt2	UDP-N-acetyl-alpha-D-galactosamine:polypeptide N-acetylgalactosaminyltransferase 2 (Galnt2)	0.0055098	2.32947
Tmem38b	transmembrane protein 38B (Tmem38b).	0.00173414	2.32947
D4Wsu114e	DNA segment, Chr 4, Wayne State University 114, expressed (D4Wsu114e)	0.00241331	2.32409
Pcdh9	protocadherin 9 (Pcdh9)	0.000521966	2.31873
Dusp27	dual specificity phosphatase 27 (putative) (Dusp27)	0.00316221	2.31605
1700054E11Rik		0.000113961	2.31071
Bmp2k	BMP2 inducible kinase (Bmp2k)	0.00207714	2.30302
Atg12	autophagy-related 12 (yeast) (Atg12)	0.00528595	2.2974
Fibp		9.30583e-05	2.29209
Tspan18	tetraspanin 18 (Tspan18)	0.00536649	2.28153
Trim11	tripartite motif-containing 11 (Trim11)	0.00417041	2.27626
Gnao1	guanine nucleotide binding protein, alpha O (Gnao1), transcript variant A.	0.00242219	2.27101
Btbd1	BTB (POZ) domain containing 1 (Btbd1)	0.000476398	2.25793
Coq10a	COMM domain containing 3 (Commd3)	0.000598089	2.25272
Gemin7	gem (nuclear organelle) associated protein 7 (Gemin7)	0.00496392	2.25272
EG434402	PREDICTED: predicted gene, EG434402 (EG434402)	0.00413121	2.24233
Hist1h4k	histone cluster 1, H4k (Hist1h4k)	0.00236115	2.24233
Nfatc3		0.000417969	2.24233
C430014G13Rik		0.000557475	2.23974
Ctsh	CTD (carboxy-terminal domain, RNA polymerase II, polypeptide A) small phosphatase-like (Ctdspl)	0.00115024	2.23974
4933409N07Rik		0.00406175	2.23716
C920004C08Rik		0.00525382	2.23716
4930565A21Rik		0.000163916	2.23457
Tnik		0.000374297	2.23199
Irgq	immunity-related GTPase family, Q (Irgq)	0.00150032	2.22684
Pnkp	polynucleotide kinase 3'- phosphatase (Pnkp)	0.000272279	2.22318
Afg3l1		0.000935238	2.21751
A130093I21Rik		0.00196217	2.21146
Lynx1	Ly6/neurotoxin 1 (Lynx1)	0.0037545	2.20891
Kctd1	potassium channel tetramerisation domain containing 1 (Kctd1)	0.0056233	2.20381
Tusc1	tumor suppressor candidate 1 (Tusc1).	0.00122478	2.19619
Hoxa2	homeo box A2 (Hoxa2).	0.000701028	2.19112
Fxr2	fragile X mental retardation, autosomal homolog 2 (Fxr2).	0.000887657	2.18606
Pigu	phosphatidylinositol glycan anchor biosynthesis, class U (Pigu).	8.59281e-05	2.18354
Exoc8	exocyst complex component 8 (Exoc8).	0.00228374	2.1785
2810422J05Rik		0.00199755	2.17096
Arhgap17	Rho GTPase activating protein 17 (Arhgap17).	0.00556547	2.16845
Mterfd2	MTERF domain containing 2 (Mterfd2).	0.00185459	2.16845
Rasa3		0.00247413	2.15348
Saal1	PREDICTED: serum amyloid A-like 1, transcript variant 1 (Saal1).	0.000613408	2.14851
Wnk4	WNK lysine deficient protein kinase 4 (Wnk4).	0.00158906	2.13366
Swap70	SWA-70 protein (Swap70).	0.00192928	2.12874
Pqlc3	PQ loop repeat containing (Pqlc3).	0.00498221	2.11893
Whrn	whirlin (Whrn), transcript variant 6.	0.000383695	2.11893
Mical1	microtubule associated monoxygenase, calponin and LIM domain containing 1 (Mical1).	0.00577539	2.1116
Pbx4		0.0027245	2.09943
Slc25a35	solute carrier family 25, member 35 (Slc25a35).	0.00296637	2.09217
Nr2f2	nuclear receptor subfamily 2, group F, member 2 (Nr2f2), transcript variant 2.	0.00181085	2.08252
Hgfac	hepatocyte growth factor activator (Hgfac).	0.0041011	2.08012
6230400G14Rik		0.00102694	2.06814
A830081L15Rik		0.00276471	2.0586
Kctd15	potassium channel tetramerisation domain containing 15 (Kctd15).	0.00346651	2.05623
Upf1	UPF1 regulator of nonsense transcripts homolog (yeast) (Upf1).	0.0025451	2.05623
1200003I07Rik		1.15081e-06	2.04911
Mageh1	melanoma antigen, family H, 1 (Mageh1).	0.000716547	2.04438
Wars2	tryptophanyl tRNA synthetase 2 (mitochondrial) (Wars2), nuclear gene encoding mitochondrial protein.	0.00324579	2.03731
Gss		0.00208136	2.03496
Kcnf1	potassium voltage-gated channel, subfamily F, member 1 (Kcnf1).	0.00199465	2.03261
Cd274	CD109 antigen (Cd109).	0.00467073	2.03026
Gpld1		0.00170669	2.02558
EG240038	PREDICTED: predicted gene, EG240038, transcript variant 1 (EG240038).	0.00254677	2.02324
Wtip	WT1-interacting protein (Wtip).	0.00180589	2.02324
Gna11		0.00321993	2.0209
Ihpk2	inositol hexaphosphate kinase 2 (Ihpk2).	0.00165529	2.0209
Tcea3	transcription elongation factor A (SII), 3 (Tcea3).	0.00335381	2.0209
Psrc1	proline/serine-rich coiled-coil 1 (Psrc1).	0.00490545	2.01857
Commd3		0.00491529	2.00463
Zfp513	zinc finger protein 513 (Zfp513).	0.00500328	2.00463
Pdxdc1	pyridoxal-dependent decarboxylase domain containing 1 (Pdxdc1), transcript variant 3.	0.0015018	0.494828
Pick1	protein interacting with C kinase 1 (Pick1), transcript variant 1	0.000933202	0.493116
B230217C12Rik	RIKEN cDNA B230217C12 gene (B230217C12Rik)	0.00561306	0.492547
Myg1	melanocyte proliferating gene 1 (Myg1).	0.0019464	0.492547
Tes	testis derived transcript (Tes), transcript variant 1.	0.00419324	0.491978
Hmgcl	3-hydroxy-3-methylglutaryl-Coenzyme A lyase (Hmgcl).	7.60589e-06	0.490843
Apoc1	apolipoprotein C-I (Apoc1).	0.00190708	0.48858
Gypc	glycophorin C (Gypc).	0.00257678	0.485766
Kif4	kinesin family member 4 (Kif4).	0.00373705	0.482968
Thbs3	thrombospondin 3 (Thbs3).	0.00452911	0.482411
Smyd5	SET and MYND domain containing 5 (Smyd5)	0.00307822	0.481589
Aste1	asteroid homolog 1 (Drosophila) (Aste1)	0.00369052	0.481297
7530420F21Rik		0.00123913	0.479632
C030003D03Rik	RIKEN cDNA C030003D03 gene (C030003D03Rik).	0.00297202	0.476319
Gabpb2	GA repeat binding protein, beta 2 (Gabpb2), transcript variant 1.	0.000609188	0.475769
Apcdd1	adenomatosis polyposis coli down-regulated 1 (Apcdd1).	0.000632776	0.472483
Ptprs		0.000872444	0.471937
2410146L05Rik	RIKEN cDNA 2410146L05 gene (2410146L05Rik).	0.000121077	0.469761
Gnl3	guanine nucleotide binding protein-like 3 (nucleolar) (Gnl3), transcript variant 2.	0.00284306	0.467579
Tmc6	transmembrane channel-like gene family 6 (Tmc6), transcript variant 1.	0.000777337	0.464366
Sec22b	SEC22 vesicle trafficking protein homolog B (S. cerevisiae) (Sec22b).	0.00299843	0.46383
Itga2b	integrin alpha 2b (Itga2b).	8.31273e-05	0.463294
Bicc1		0.00263634	0.460954
Ppp1cc	protein phosphatase 1, catalytic subunit, gamma isoform (Ppp1cc).	0.00114353	0.460626
Sec61b	Sec61 beta subunit (Sec61b).	0.000538102	0.460094
Xrcc6	X-ray repair complementing defective repair in Chinese hamster cells 6 (Xrcc6).	0.00061149	0.460094
Scd2	stearoyl-Coenzyme A desaturase 2 (Scd2).	0.0058404	0.457973
Traf5	Tnf receptor-associated factor 5 (Traf5).	0.000471263	0.453236
Cd74	CD47 antigen (Rh-related antigen, integrin-associated signal transducer) (Cd47)	0.000917039	0.45219
D130071N09		0.00453474	0.450105
G430005B15Rik		0.00329926	0.449066
Ilf3	interleukin enhancer binding factor 3 (Ilf3), transcript variant 3.	0.00109908	0.449066
2010204K13Rik		0.0028814	0.447513
Mknk1		0.00528613	0.442372
Amn	amnionless (Amn).	0.00157521	0.440333
E130016E03Rik	RIKEN cDNA E130016E03 gene (E130016E03Rik).	0.00311691	0.438303
Cdh13	cytidine deaminase (Cda).	0.000960418	0.435778
Rhof	ras homolog gene family, member f (Rhof).	9.82551e-05	0.435778
Eya4		0.00208848	0.434773
Mapk12	mitogen-activated protein kinase 12 (Mapk12).	8.71791e-05	0.432768
1110018J23Rik		0.00117693	0.428787
Anxa9	annexin A9 (Anxa9), transcript variant 2.	0.00200172	0.428292
Rad23b		0.00131289	0.428135
Eif2s2	eukaryotic translation initiation factor 2, subunit 2 (beta) (Eif2s2).	0.000850902	0.425825
Upp1	uridine phosphorylase 1 (Upp1).	0.00328443	0.425825
AU020206		0.00486862	0.420448
Foxf1a	forkhead box F1a (Foxf1a).	0.0040705	0.420448
Stat2	signal transducer and activator of transcription 2 (Stat2).	0.00219187	0.418994
Spata7	spermatogenesis associated 7 (Spata7).	0.00195098	0.418027
Acpp	acid phosphatase, prostate (Acpp), transcript variant 1.	0.00219438	0.41658
Ptprd	protein tyrosine phosphatase, receptor type, D (Ptprd), transcript variant a.	3.26128e-05	0.41658
9530073A13Rik		0.00156237	0.415139
Lamc2	laminin, gamma 2 (Lamc2).	0.00455688	0.41466
4930528F23Rik	PREDICTED: RIKEN cDNA 4930528F23 gene (4930528F23Rik).	0.00396957	0.41132
Nle1	notchless homolog 1 (Drosophila) (Nle1).	0.000594125	0.41132
Tspo	translocator protein (Tspo).	0.00285727	0.40945
Psma7	proteasome (prosome, macropain) subunit, alpha type 7 (Psma7)	0.000240562	0.409424
Abcb10		0.000760062	0.408951
Slc39a9	PREDICTED: solute carrier family 39 (zinc transporter), member 9 (Slc39a9)	0.000572232	0.407066
Cyp7b1	chemokine (C-X-C motif) ligand 9 (Cxcl9).	0.00458042	0.405657
2610029G23Rik	RIKEN cDNA 2610029G23 gene (2610029G23Rik).	0.00125287	0.404254
Psme1	proteasome (prosome, macropain) 28 subunit, alpha (Psme1).	0.00393623	0.400574
Oasl1	2'-5' oligoadenylate synthetase-like 1 (Oasl1)	0.00368516	0.397768
A630097K09Rik		3.60281e-05	0.397309
Abca9	ATP-binding cassette, sub-family A (ABC1), member 9 (Abca9).	0.0043398	0.391839
Has2	hyaluronan synthase 2 (Has2).	0.00221158	0.390935
6330414G02Rik		6.10534e-06	0.389132
Map4k1	mitogen-activated protein kinase kinase kinase kinase 1 (Map4k1).	0.000683753	0.389132
Xdh	xanthine dehydrogenase (Xdh).	0.000532675	0.386445
scl0003799.1_2		0.0057264	0.384663
P2ry14	purinergic receptor P2Y, G-protein coupled, 14 (P2ry14), transcript variant 1.	0.00455662	0.383332
2210021J22Rik		0.00552338	0.381124
BC025458		0.00379863	0.378929
Stat1	signal transducer and activator of transcription 1 (Stat1).	0.00259496	0.378929
A730098N08Rik		0.00428092	0.378492
Dhrs7	dehydrogenase/reductase (SDR family) member 7 (Dhrs7)	0.000261002	0.373712
Angptl6		0.00263754	0.372419
C130071M06Rik		0.00357633	0.36942
EG433229	PREDICTED: predicted gene, EG433229, transcript variant 7 (EG433229)	0.00422662	0.368993
Bicd1	bicaudal D homolog 1 (Drosophila) (Bicd1)	0.00581675	0.366021
C330018C16Rik		0.000362194	0.365599
Dock11	dedicator of cytokinesis 11 (Dock11)	0.00421545	0.365599
Il20rb	interleukin 20 receptor beta (Il20rb), transcript variant 2	0.00125958	0.364334
2310039E09Rik	RIKEN cDNA 2310039E09 gene (2310039E09Rik)	0.000719936	0.363913
Enox1	ecto-NOX disulfide-thiol exchanger 1 (Enox1)	0.00128238	0.361817
BC006779		0.00442516	0.358903
5930412G12Rik		0.00337696	0.358489
Havcr2	hepatitis A virus cellular receptor 2 (Havcr2)	0.00376737	0.353145
9930108O06Rik		0.00252488	0.349492
Atg9b	ATG9 autophagy related 9 homolog B (S. cerevisiae) (Atg9b)	0.00100862	0.349492
Tcirg1	T-cell, immune regulator 1, ATPase, H+ transporting, lysosomal V0 protein A3 (Tcirg1)	0.00331445	0.348283
Tspan11	tetraspanin 11 (Tspan11)	0.00172814	0.344283
Hoxc9	homeo box C9 (Hoxc9)	0.000907211	0.343092
Usp1	ubiquitin specific peptdiase 1 (Usp1)	0.00322598	0.34151
Pvrl2	poliovirus receptor-related 2 (Pvrl2)	0.00418777	0.339936
Pbp2	phosphatidylethanolamine binding protein 2 (Pbp2)	0.000866612	0.33876
9030024J15Rik		0.00570927	0.336808
Mbp	myelin basic protein (Mbp), transcript variant 8	0.00297184	0.335256
D230007K08Rik	PREDICTED: RIKEN cDNA D230007K08 gene, transcript variant 5 (D230007K08Rik)	0.000677951	0.333325
Sh3kbp1	SH3-domain kinase binding protein 1 (Sh3kbp1)	0.00556945	0.330147
Bst2	bone marrow stromal cell antigen 2 (Bst2)	0.00326316	0.32722
Atp2a2	ATPase, Ca++ transporting, cardiac muscle, slow twitch 2 (Atp2a2)	0.00443131	0.325335
Slc4a7		0.000422579	0.32421
1110062M06Rik		0.00436937	0.323088
Acacb		0.00543802	0.322715
Irf1	interferon regulatory factor 1 (Irf1)	0.000255311	0.32238
Alg6	asparagine-linked glycosylation 6 homolog (yeast, alpha-1,3,-glucosyltransferase) (Alg6).	0.000276443	0.32197
Lrig1	leucine-rich repeats and immunoglobulin-like domains 1 (Lrig1).	0.00179913	0.31864
Plekhg4	pleckstrin homology domain containing, family G (with RhoGef domain) member 4 (Plekhg4).	0.000239239	0.314617
Arhgef3	Rho guanine nucleotide exchange factor (GEF) 3 (Arhgef3).	0.00166116	0.314253
Lif	leukemia inhibitory factor (Lif), transcript variant 2.	0.000433809	0.311722
Hoxc10	homeo box C10 (Hoxc10).	0.0059065	0.311003
D15Bwg0759e		0.0029688	0.30566
Egfr	epidermal growth factor receptor (Egfr), transcript variant 1.	0.00252533	0.304187
Artn	artemin (Artn).	0.00136711	0.304183
Crabp1	carboxypeptidase Z (Cpz).	0.00106146	0.303198
Rnf41	ring finger protein 41 (Rnf41).	0.00453564	0.302848
1700026D08Rik		0.00377429	0.3018
Fos	FBJ osteosarcoma oncogene (Fos).	0.00522945	0.3018
Arhgef15	Rho guanine nucleotide exchange factor (GEF) 15 (Arhgef15).	0.000925115	0.301452
Rrp7a	ribosomal RNA processing 7 homolog A (S. cerevisiae) (Rrp7a).	0.00342532	0.299024
H2-T23	histocompatibility 2, T region locus 23 (H2-T23).	0.00397278	0.296616
2810439F02Rik	RIKEN cDNA 2810439F02 gene (2810439F02Rik).	0.0050596	0.296273
Fbxl13	F-box and leucine-rich repeat protein 13 (Fbxl13).	0.00291398	0.294227
Acsl4	acyl-CoA synthetase long-chain family member 4 (Acsl4), transcript variant 3	0.00227466	0.292532
Bdkrb1	bradykinin receptor, beta 1 (Bdkrb1).	0.000608355	0.292532
Ddx25	DEAD (Asp-Glu-Ala-Asp) box polypeptide 25 (Ddx25).	0.00143937	0.291183
D330034M21Rik		0.00423193	0.289841
Lrrc17	PREDICTED: leucine rich repeat containing 17, transcript variant 1 (Lrrc17)	0.00480003	0.287507
6330406I15Rik	RIKEN cDNA 6330406I15 gene (6330406I15Rik).	7.9621e-05	0.286936
D14Ertd668e	DNA segment, Chr 14, ERATO Doi 668, expressed (D14Ertd668e)	0.000185245	0.286843
Brd2	bromodomain containing 2 (Brd2), transcript variant 2	0.000512704	0.285191
Tmem45a	transmembrane protein 45a (Tmem45a)	0.00228933	0.283237
Hexdc	hexosaminidase (glycosyl hydrolase family 20, catalytic domain) containing (Hexdc)	0.000481887	0.282408
Ugcg		0.000683338	0.276744
Tgfbr3	transforming growth factor, beta receptor III (Tgfbr3)	0.00294643	0.275476
Irf7	interferon regulatory factor 7 (Irf7)	0.00195777	0.274841
Dennd3	DENN/MADD domain containing 3 (Dennd3)	0.00344395	0.274206
2010004A03Rik	RIKEN cDNA 2010004A03 gene (2010004A03Rik)	0.00237615	0.271057
Foxred2	FAD-dependent oxidoreductase domain containing 2 (Foxred2)	0.000126067	0.270744
Egfl7	EGF-like domain 7 (Egfl7), transcript variant c	0.00179442	0.270431
Irf9	interferon regulatory factor 9 (Irf9)	0.00162784	0.269496
Sema3e		0.00446255	0.268874
Dpep1	dipeptidase 1 (renal) (Dpep1)	0.00548129	0.267943
Unc5c		0.00269524	0.264469
C330018M05Rik		0.000570348	0.264255
Ube2l6	ubiquitin-conjugating enzyme E2L 6 (Ube2l6).	0.00440803	0.264192
Abcb1b	ATP-binding cassette, sub-family B (MDR/TAP), member 1B (Abcb1b).	0.00405366	0.260918
Pvr	poliovirus receptor (Pvr).	0.00513422	0.258816
Col15a1	C-type lectin domain family 2, member e (Clec2e)	0.00119075	0.257623
Zfp365	zinc finger protein 365 (Zfp365).	0.000434009	0.252321
Gba2	glucosidase beta 2 (Gba2).	0.00315861	0.247129
Xpnpep2	X-prolyl aminopeptidase (aminopeptidase P) 2, membrane-bound (Xpnpep2), transcript variant 1.	0.0038733	0.246274
Lefty1	left right determination factor 1 (Lefty1).	0.00250415	0.245138
Nfkbie	nuclear factor of kappa light polypeptide gene enhancer in B-cells inhibitor, epsilon (Nfkbie)	0.00168262	0.244855
H2-M3	histocompatibility 2, M region locus 3 (H2-M3)	0.000529794	0.241763
Arv1	ARV1 homolog (yeast) (Arv1)	0.000644272	0.240649
Scube3	signal peptide, CUB domain, EGF-like 3 (Scube3)	0.0028823	0.239816
A230070D14Rik		0.00442447	0.234339
Slc12a1	solute carrier family 12, member 1 (Slc12a1), transcript variant 2	0.00150531	0.231263
1200002N14Rik	RIKEN cDNA 1200002N14 gene (1200002N14Rik).	0.000251907	0.231112
Ramp3	receptor (calcitonin) activity modifying protein 3 (Ramp3)	0.000931433	0.229785
Gdf10	growth differentiation factor 10 (Gdf10).	0.00395301	0.229516
Rgl1	ral guanine nucleotide dissociation stimulator,-like 1 (Rgl1)	0.00595835	0.228722
Raet1b	retinoic acid early transcript beta (Raet1b)	0.000875437	0.228194
Cd47	CD34 antigen (Cd34)	0.000912132	0.227405
Apol7a	apolipoprotein L 7a (Apol7a)	0.000701416	0.226095
Erdr1	erythroid differentiation regulator 1 (Erdr1)	0.00234647	0.226095
Oas1b	2'-5' oligoadenylate synthetase 1B (Oas1b)	0.00469565	0.223299
Rgs17		0.00207028	0.223099
Fbxo32	F-box protein 32 (Fbxo32)	0.00449802	0.222112
Ccdc124	carbonic anyhydrase 12 (Car12)	0.00192104	0.221954
Gsdmdc1	gasdermin domain containing 1 (Gsdmdc1)	0.000596932	0.216369
Tyki		0.000177844	0.215636
Mfsd2	major facilitator superfamily domain containing 2 (Mfsd2)	0.000681788	0.215387
Lgr6	leucine-rich repeat-containing G protein-coupled receptor 6 (Lgr6)	0.00252184	0.215372
B230369L08Rik		0.00275638	0.21071
Gbp6	guanylate binding protein 6 (Gbp6)	0.00140837	0.210224
Fes	feline sarcoma oncogene (Fes)	0.00362838	0.207809
Sgsm1	small G protein signaling modulator 1 (Sgsm1)	0.00414089	0.206851
Gria1	glutamate receptor, ionotropic, AMPA1 (alpha 1) (Gria1)	0.000851146	0.206824
Epha3	Eph receptor A3 (Epha3)	0.00530025	0.206305
Igtp	interferon gamma induced GTPase (Igtp)	0.00201478	0.204239
Hgf		0.000570823	0.201111
Mme	membrane metallo endopeptidase (Mme)	0.00221622	0.199575
Ifi35	interferon-induced protein 35 (Ifi35)	0.00039287	0.197055
E330013P04Rik		0.0011253	0.192554
Evi2a	ecotropic viral integration site 2a (Evi2a), transcript variant 2	0.000241946	0.188373
Cd34	CD274 antigen (Cd274)	0.00026216	0.187939
A130019H11Rik		0.0014319	0.185995
Cxcl9	chemokine (C-X-C motif) ligand 16 (Cxcl16)	0.00332407	0.184497
Rnf213	ring finger protein 213 (Rnf213)	0.00168109	0.183646
Gbp1	guanylate binding protein 1 (Gbp1)	0.00207691	0.182167
Adrbk2	adrenergic receptor kinase, beta 2 (Adrbk2), transcript variant 2	0.000592445	0.181327
Ifit3	interferon-induced protein with tetratricopeptide repeats 3 (Ifit3)	0.00384801	0.1807
Mycl1	v-myc myelocytomatosis viral oncogene homolog 1, lung carcinoma derived (avian) (Mycl1)	0.000438328	0.1807
Gpr137b-ps	G protein-coupled receptor 137B, pseudogene (Gpr137b-ps), non-coding RNA.	0.000657059	0.17739
Parp14	poly (ADP-ribose) polymerase family, member 14 (Parp14)	0.00114028	0.175556
Axin2	axin2 (Axin2)	0.00101134	0.16938
Dhx58	DEXH (Asp-Glu-X-His) box polypeptide 58 (Dhx58)	0.000560685	0.166722
Iqgap2	IQ motif containing GTPase activating protein 2 (Iqgap2)	0.00270888	0.166086
Flrt3	fibronectin leucine rich transmembrane protein 3 (Flrt3)	3.4952e-05	0.16361
Apol9b	apolipoprotein L 9b (Apol9b)	2.789e-06	0.161358
Xist	inactive X specific transcripts (Xist) on chromosome X	0.000548425	0.161171
Clec2e	chloride channel 7 (Clcn7)	3.8481e-05	0.155681
Ngfr	nerve growth factor receptor (TNFR superfamily, member 16) (Ngfr)	0.00434762	0.155681
Olfr1260	olfactory receptor 1260 (Olfr1260)	7.634e-05	0.153361
A130026C10Rik		0.00444064	0.150726
Col4a1	PREDICTED: collagen, type XXII, alpha 1, transcript variant 3 (Col22a1)	0.00237609	0.149167
Col22a1	collagen, type XV, alpha 1 (Col15a1)	0.000533733	0.148995
Slc6a4		0.00150379	0.144648
Qpct	glutaminyl-peptide cyclotransferase (glutaminyl cyclase) (Qpct).	0.00017736	0.141774
Iigp2	interferon inducible GTPase 2 (Iigp2)	0.0039312	0.141284
Arsj	arylsulfatase J (Arsj)	0.000759939	0.140958
Fkbp11	FK506 binding protein 11 (Fkbp11)	0.00125118	0.139017
Cxcl10	coxsackie virus and adenovirus receptor (Cxadr), transcript variant 1	0.00314395	0.138376
Traf1		0.00275872	0.136629
Kcnk5	potassium channel, subfamily K, member 5 (Kcnk5)	0.000891543	0.136313
Ccng1	chemokine (C-C motif) ligand 5 (Ccl5)	0.000511831	0.135842
Serhl	serine hydrolase-like (Serhl)	0.000270914	0.131063
Hap1	huntingtin-associated protein 1 (Hap1)	0.00312615	0.127627
Anxa4	annexin A4 (Anxa4)	0.000933589	0.126599
Bnc1	basonuclin 1 (Bnc1)	0.0004633	0.122428
H2-DMb2	histocompatibility 2, class II, locus Mb2 (H2-DMb2)	0.000542138	0.121582
BC017643	cDNA sequence BC017643 (BC017643)	0.00100649	0.117305
Car12		0.000354807	0.117305
EG240327	predicted gene, EG240327 (EG240327)	0.000291963	0.115957
D630022O22Rik		0.000682593	0.114626
Pdzrn4	PREDICTED: PDZ domain containing RING finger 4 (Pdzrn4).	0.00583914	0.109197
Smpdl3b	sphingomyelin phosphodiesterase, acid-like 3B (Smpdl3b).	0.00071985	0.106703
Gdnf	glial cell line derived neurotrophic factor (Gdnf).	0.00480985	0.104869
Pdgfb		0.00387375	0.104145
Slc7a11	solute carrier family 7 (cationic amino acid transporter, y+ system), member 11 (Slc7a11).	0.0043335	0.102356
5930404A08Rik		0.000434313	0.0988693
Crlf1	cellular retinoic acid binding protein I (Crabp1).	0.00536181	0.0933202
Oas1g	2'-5' oligoadenylate synthetase 1G (Oas1g).	0.00371238	0.0929034
Cda	CD74 antigen (invariant polypeptide of major histocompatibility complex, class II antigen-associated) (Cd74), transcript variant 1.	0.000556443	0.091823
BC003314		0.00046866	0.0883883
Mll5		8.1904e-05	0.0864694
Gldc	glycine decarboxylase (Gldc)	0.00455352	0.0837062
Fbln1		0.00474496	0.0828512
Oas2	2'-5' oligoadenylate synthetase 2 (Oas2)	0.00497196	0.0792012
Drctnnb1a		3.1344e-05	0.0784726
Cxcl16	chemokine (C-X-C motif) ligand 10 (Cxcl10)	3.0558e-05	0.077661
Ifi27	interferon, alpha-inducible protein 27 (Ifi27)	0.00414774	0.0754501
Trpc3	transient receptor potential cation channel, subfamily C, member 3 (Trpc3)	0.00169066	0.0750155
scl0002507.1_236		0.00267554	0.0734717
Bzrap1	benzodiazapine receptor associated protein 1 (Bzrap1)	0.00149115	0.0730486
Tmem176b	transmembrane protein 176B (Tmem176b)	0.00109493	0.0720429
Gbp2	guanylate binding protein 2 (Gbp2)	0.00438446	0.0685516
Mela		0.000240619	0.0659874
Ctdspl	component of Sp100-rs (Csprs)	0.00129356	0.0595399
Oasl2	2'-5' oligoadenylate synthetase-like 2 (Oasl2)	0.000209778	0.0555271
Ppan		1.2493e-05	0.0547246
Gbp3	guanylate binding protein 3 (Gbp3)	0.000254464	0.0516237
Mmp9	matrix metallopeptidase 9 (Mmp9)	3.52e-07	0.0451749
Tmem176a	transmembrane protein 176A (Tmem176a)	0.00404236	0.0448111
Mx2		6.3956e-05	0.0442964
Mmp10	matrix metallopeptidase 10 (Mmp10)	0.00190072	0.0440922
Usp18	ubiquitin specific peptidase 18 (Usp18)	0.00562009	0.0414256
Mmp13	matrix metallopeptidase 13 (Mmp13)	0.00396747	0.0325771
Atf4	activating transcription factor 4 (Atf4)	0.000982546	0.0309268
Tomm22	translocase of outer mitochondrial membrane 22 homolog (yeast) (Tomm22), nuclear gene encoding mitochondrial protein.	0.000122319	0.0239583
Osr2	odd-skipped related 2 (Drosophila) (Osr2)	0.000323723	0.0208373
Rsad2	radical S-adenosyl methionine domain containing 2 (Rsad2)	0.00160504	0.0202631
Cyp7b1	cytochrome P450, family 7, subfamily b, polypeptide 1 (Cyp7b1)	0.0014253	0.0144612
Mmp3	matrix metallopeptidase 3 (Mmp3)	5.6442e-05	0.0140426
Xlr4a	X-linked lymphocyte-regulated 4A (Xlr4a)	0.00200455	0.0123587
