# Supplementary material for: HuR-Regulated mRNAs Associated with Nuclear hnRNP A1-RNP Complexes
Source: MDPI journal article supplement (doi:10.3390/ijms141020256), 2013-10-11
Supplement: s3 [file s3]

## Sheet: NucTARGETSforRIKENS
Symbol	Definition	Enrichment in HuR WT	Enrichment in HuR KO	Enrichment Ratio (HuR KO/HuR WT)
Thumpd1	Mus musculus THUMP domain containing 1 (Thumpd1), mRNA.	0.619854	2.43964	3.93583
Tceal5	Mus musculus transcription elongation factor A (SII)-like 5 (Tceal5), mRNA.	1.10318	3.88164	3.51859
Mbtd1	Mus musculus mbt domain containing 1 (Mbtd1), mRNA.	0.595291	2.06098	3.46214
Glrx3	Mus musculus glutaredoxin 3 (Glrx3), mRNA.	1.18921	3.53081	2.96904
Mdfic	Mus musculus MyoD family inhibitor domain containing (Mdfic), mRNA.	1.08298	3.11666	2.87786
Mrpl1	Mus musculus mitochondrial ribosomal protein L1 (Mrpl1), nuclear gene encoding mitochondrial protein, transcript variant 1, mRNA.	0.912776	2.57279	2.81864
Ccnh	Mus musculus cyclin H (Ccnh), mRNA.	1.81714	5.03968	2.77341
C330023M02Rik	Mus musculus RIKEN cDNA C330023M02 gene (C330023M02Rik), mRNA.	0.772889	2.13366	2.76063
Gyg	Mus musculus glycogenin (Gyg), mRNA.	1.28639	3.54717	2.75746
Aldh1a1	Mus musculus aldehyde dehydrogenase family 1, subfamily A1 (Aldh1a1), mRNA.	1.29684	3.53081	2.72263
H1f0	Mus musculus H1 histone family, member 0 (H1f0), mRNA.	1.03646	2.81539	2.71635
Dek	Mus musculus DEK oncogene (DNA binding) (Dek), mRNA.	1.18921	3.16017	2.65737
BC020002	Mus musculus cDNA sequence BC020002 (BC020002), mRNA.	0.988514	2.62079	2.65124
Mtrf1l	Mus musculus mitochondrial translational release factor 1-like (Mtrf1l), nuclear gene encoding mitochondrial protein, mRNA.	0.893992	2.36199	2.64207
Esd	Mus musculus esterase D/formylglutathione hydrolase (Esd), mRNA.	0.895025	2.3511	2.62685
4933409L06Rik		0.793701	2.07053	2.6087
Ptp4a2	Mus musculus protein tyrosine phosphatase 4a2 (Ptp4a2), mRNA.	1.44226	3.74076	2.59368
C920027I18Rik		0.998845	2.56093	2.56389
Klf10	Mus musculus Kruppel-like factor 10 (Klf10), mRNA.	1.01045	2.57279	2.54618
Wipf1	Mus musculus WAS/WASL interacting protein family, member 1 (Wipf1), mRNA.	0.993092	2.50244	2.51985
Scoc	Mus musculus short coiled-coil protein (Scoc), transcript variant 1, mRNA.	1.39959	3.52266	2.51692
Ogn	Mus musculus osteoglycin (Ogn), mRNA.	1.21982	3.05958	2.50822
D730042P09Rik		1.32103	3.30198	2.49955
Hexb	Mus musculus hexosaminidase B (Hexb), mRNA.	1.37554	3.41054	2.47942
Rin2	Mus musculus Ras and Rab interactor 2 (Rin2), mRNA.	1.28788	3.18951	2.47656
2210016F16Rik	PREDICTED: Mus musculus RIKEN cDNA 2210016F16 gene (2210016F16Rik), mRNA.	1.16473	2.88119	2.4737
Tceal6	Mus musculus transcription elongation factor A (SII)-like 6 (Tceal6), mRNA.	0.90021	2.21402	2.45945
Pdcd5	Mus musculus programmed cell death 5 (Pdcd5), mRNA.	1.6529	4.00925	2.42559
Aph1b	Mus musculus anterior pharynx defective 1b homolog (C. elegans) (Aph1b), mRNA.	1.0693	2.59068	2.42278
Pfdn4		1.03049	2.47942	2.40606
Zfp820	Mus musculus zinc finger protein 820 (Zfp820), mRNA.	0.949342	2.27626	2.39772
9130019O22Rik	Mus musculus RIKEN cDNA 9130019O22 gene (9130019O22Rik), mRNA.	0.97942	2.34567	2.39496
A430106G13Rik		1.66056	3.9632	2.38666
Ccnc		0.874583	2.08493	2.38391
1110002B05Rik	Mus musculus RIKEN cDNA 1110002B05 gene (1110002B05Rik), mRNA.	0.926588	2.19872	2.37292
1700047I17Rik1	Mus musculus RIKEN cDNA 1700047I17 gene 1 (1700047I17Rik1), mRNA.	1.60029	3.79298	2.37018
Taf13	Mus musculus TAF13 RNA polymerase II, TATA box binding protein (TBP)-associated factor (Taf13), mRNA.	0.99424	2.34567	2.35926
Spp1	Mus musculus secreted phosphoprotein 1 (Spp1), mRNA.	2.13613	5.01645	2.34838
Cnih	Mus musculus cornichon homolog (Drosophila) (Cnih), mRNA.	1.32409	3.06666	2.31605
Hspe1	Mus musculus heat shock protein 1 (chaperonin 10) (Hspe1), mRNA.	2.08975	4.83439	2.31338
Rab11a	Mus musculus RAB11a, member RAS oncogene family (Rab11a), mRNA.	0.97041	2.22427	2.29209
Pole4	Mus musculus polymerase (DNA-directed), epsilon 4 (p12 subunit) (Pole4), mRNA.	1.19058	2.72578	2.28946
Capn7	Mus musculus calpain 7 (Capn7), mRNA.	1.08925	2.4909	2.2868
Rb1	Mus musculus retinoblastoma 1 (Rb1), mRNA.	1.48796	3.38698	2.27626
Vps29	Mus musculus vacuolar protein sorting 29 (S. pombe) (Vps29), mRNA.	1.32103	2.97592	2.25273
Fbxl5	Mus musculus F-box and leucine-rich repeat protein 5 (Fbxl5), mRNA.	1.11085	2.45661	2.21147
Net1	Mus musculus neuroepithelial cell transforming gene 1 (Net1), transcript variant 2, mRNA.	1.03886	2.2974	2.21146
Zc3h15	Mus musculus zinc finger CCCH-type containing 15 (Zc3h15), mRNA.	1.18236	2.6087	2.20635
Ergic2	Mus musculus ERGIC and golgi 2 (Ergic2), transcript variant 1, mRNA.	1.30134	2.86791	2.20381
Usp1	Mus musculus ubiquitin specific peptdiase 1 (Usp1), mRNA.	1.04972	2.31338	2.20381
Lhx9	Mus musculus LIM homeobox protein 9 (Lhx9), transcript variant 1, mRNA.	1.29385	2.84153	2.19618
Zcchc9	Mus musculus zinc finger, CCHC domain containing 9 (Zcchc9), mRNA.	0.985094	2.1386	2.17096
Nat5	Mus musculus N-acetyltransferase 5 (ARD1 homolog, S. cerevisiae) (Nat5), mRNA.	1.20164	2.6087	2.17095
Bmpr1a	Mus musculus bone morphogenetic protein receptor, type 1A (Bmpr1a), mRNA.	1.25266	2.71321	2.16596
Slc14a1	Mus musculus solute carrier family 14 (urea transporter), member 1 (Slc14a1), mRNA.	1.08048	2.33486	2.16095
Ptges3	Mus musculus prostaglandin E synthase 3 (cytosolic) (Ptges3), mRNA.	1.6245	3.49833	2.15348
Tnfaip8	Mus musculus tumor necrosis factor, alpha-induced protein 8 (Tnfaip8), mRNA.	2.23457	4.8121	2.15348
Palld	PREDICTED: Mus musculus palladin, cytoskeletal associated protein, transcript variant 4 (Palld), mRNA.	1.17827	2.51403	2.13366
C920006C10Rik		1.19748	2.54324	2.12383
Plaa	Mus musculus phospholipase A2, activating protein (Plaa), mRNA.	1.85746	3.91768	2.10916
Pik3r3	Mus musculus phosphatidylinositol 3 kinase, regulatory subunit, polypeptide 3 (p55) (Pik3r3), mRNA.	1.09556	2.30271	2.10186
Prkd3	Mus musculus protein kinase D3 (Prkd3), mRNA.	0.982821	2.05623	2.09217
BC085271	Mus musculus cDNA sequence BC085271 (BC085271), mRNA.	1.31039	2.72578	2.08013
Zfp398	Mus musculus zinc finger protein 398 (Zfp398), transcript variant 1, mRNA.	1.14208	2.36745	2.07293
Stag1	Mus musculus stromal antigen 1 (Stag1), mRNA. XM_919981 XM_919990 XM_920002 XM_920014 XM_920028	1.08548	2.23974	2.06336
Klhl7	Mus musculus kelch-like 7 (Drosophila) (Klhl7), mRNA.	1.17283	2.41719	2.06099
Oxr1	Mus musculus oxidation resistance 1 (Oxr1), transcript variant 1, mRNA.	1.40282	2.88786	2.05861
Ddx3x	Mus musculus DEAD/H (Asp-Glu-Ala-Asp/His) box polypeptide 3, X-linked (Ddx3x), mRNA.	1.2156	2.4909	2.04911
Wbscr14		1.05093	2.14851	2.04439
Gnpda2	Mus musculus glucosamine-6-phosphate deaminase 2 (Gnpda2), mRNA.	2.16595	4.34694	2.00694
Lima1	Mus musculus LIM domain and actin binding 1 (Lima1), mRNA.	1.01162	2.02792	2.00463
Rps3	Mus musculus ribosomal protein S3 (Rps3), mRNA.	1.7593	3.50642	1.99308
Ctnnb1	Mus musculus catenin (cadherin associated protein), beta 1 (Ctnnb1), mRNA.	1.13419	2.25532	1.98849
Eif4g2	Mus musculus eukaryotic translation initiation factor 4, gamma 2 (Eif4g2), transcript variant 1, mRNA.	1.10829	2.20381	1.98848
Uchl5		2.50244	4.9703	1.98618
Zfp97	Mus musculus zinc finger protein 97 (Zfp97), mRNA. XM_920229 XM_920242 XM_920250 XM_920259 XM_920268 XM_920278 XM_920286	1.2072	2.39496	1.9839
Ptx3		1.07549	2.13366	1.9839
Fxr1h		1.74917	3.43426	1.96337
Tmem48	Mus musculus transmembrane protein 48 (Tmem48), mRNA.	1.19472	2.34567	1.96336
Nab1	Mus musculus Ngfi-A binding protein 1 (Nab1), mRNA.	1.15003	2.25532	1.9611
Tfb1m	Mus musculus transcription factor B1, mitochondrial (Tfb1m), nuclear gene encoding mitochondrial protein, mRNA.	1.32562	2.59668	1.95884
Pex13	Mus musculus peroxisomal biogenesis factor 13 (Pex13), mRNA.	1.4012	2.7384	1.95432
Ikzf5	Mus musculus IKAROS family zinc finger 5 (Ikzf5), mRNA.	1.09429	2.12874	1.94532
Tax1bp1	Mus musculus Tax1 (human T-cell leukemia virus type I) binding protein 1 (Tax1bp1), mRNA.	1.45734	2.83497	1.9453
Khdrbs1	Mus musculus KH domain containing, RNA binding, signal transduction associated 1 (Khdrbs1), mRNA.	1.05214	2.04202	1.94083
Mrps15	Mus musculus mitochondrial ribosomal protein S15 (Mrps15), nuclear gene encoding mitochondrial protein, mRNA.	1.51747	2.93494	1.9341
Bzw1		1.22123	2.34567	1.92074
Abi1	Mus musculus abl-interactor 1 (Abi1), transcript variant 1, mRNA.	1.22547	2.34567	1.9141
S100a4	Mus musculus S100 calcium binding protein A4 (S100a4), mRNA.	1.47597	2.8219	1.9119
Twistnb	Mus musculus TWIST neighbor (Twistnb), mRNA.	1.28343	2.45094	1.90968
1700025G04Rik	Mus musculus RIKEN cDNA 1700025G04 gene (1700025G04Rik), mRNA.	1.66056	3.16748	1.90748
Llph	Mus musculus LLP homolog, long-term synaptic facilitation (Aplysia) (Llph), mRNA.	1.99308	3.79298	1.90307
Egln3	Mus musculus EGL nine homolog 3 (C. elegans) (Egln3), mRNA.	1.15003	2.18859	1.90307
D930024N12Rik		1.20442	2.28153	1.8943
G430064M09Rik		1.25411	2.37293	1.89212
Eif3a	Mus musculus eukaryotic translation initiation factor 3, subunit A (Eif3a), mRNA.	1.24833	2.36199	1.89212
9130005N14Rik	Mus musculus RIKEN cDNA 9130005N14 gene (9130005N14Rik), mRNA.	1.77358	3.35582	1.89212
Peli1	Mus musculus pellino 1 (Peli1), mRNA.	1.08799	2.05623	1.88993
Magee1	Mus musculus melanoma antigen, family E, 1 (Magee1), mRNA.	1.49831	2.82843	1.88775
Armcx1	Mus musculus armadillo repeat containing, X-linked 1 (Armcx1), mRNA.	1.49485	2.81539	1.88339
Gm12657	predicted gene 12657	1.08048	2.03261	1.88121
Itm2b	Mus musculus integral membrane protein 2B (Itm2b), mRNA.	1.09051	2.04202	1.87254
Dazap2	Mus musculus DAZ associated protein 2 (Dazap2), mRNA.	2.4312	4.53154	1.86391
Stt3a	Mus musculus STT3, subunit of the oligosaccharyltransferase complex, homolog A (S. cerevisiae) (Stt3a), mRNA.	1.38191	2.57279	1.86176
Rnf11	Mus musculus ring finger protein 11 (Rnf11), mRNA.	1.76133	3.27918	1.86176
Caprin1	Mus musculus cell cycle associated protein 1 (Caprin1), mRNA.	1.66248	3.08086	1.85317
Setd8	Mus musculus SET domain containing (lysine methyltransferase) 8 (Setd8), mRNA.	1.27603	2.36199	1.85105
Sh3bgrl	Mus musculus SH3-binding domain glutamic acid-rich protein like (Sh3bgrl), mRNA.	1.86822	3.45815	1.85104
Hnrpa1		2.10672	3.88164	1.8425
Tde2		1.68374	3.08086	1.82977
Hadhb	Mus musculus hydroxyacyl-Coenzyme A dehydrogenase/3-ketoacyl-Coenzyme A thiolase/enoyl-Coenzyme A hydratase (trifunctional protein), beta subunit (Hadhb), nuclear gene encoding mitochondrial protein, mRNA.	1.69349	3.09513	1.82766
Kctd1	Mus musculus potassium channel tetramerisation domain containing 1 (Kctd1), mRNA. XM_978900 XM_980194	1.4406	2.62685	1.82344
Pdia6	Mus musculus protein disulfide isomerase associated 6 (Pdia6), mRNA.	1.23971	2.25012	1.81504
Ube2a	Mus musculus ubiquitin-conjugating enzyme E2A, RAD6 homolog (S. cerevisiae) (Ube2a), mRNA.	1.34568	2.43401	1.80876
Creb1	Mus musculus cAMP responsive element binding protein 1 (Creb1), transcript variant A, mRNA.	1.12117	2.02792	1.80875
Lrrc16		1.17963	2.12383	1.80042
2810022L02Rik	Mus musculus RIKEN cDNA 2810022L02 gene (2810022L02Rik), mRNA.	1.1961	2.14851	1.79626
Npc2	Mus musculus Niemann Pick type C2 (Npc2), mRNA.	2.10672	3.7755	1.79212
4833439L19Rik	Mus musculus RIKEN cDNA 4833439L19 gene (4833439L19Rik), mRNA.	1.9816	3.54717	1.79005
Asnsd1	Mus musculus asparagine synthetase domain containing 1 (Asnsd1), mRNA. XM_920067	1.59107	2.8481	1.79005
Serbp1	Mus musculus Serpine1 mRNA binding protein 1 (Serbp1), mRNA.	1.76133	3.13834	1.7818
Six1	Mus musculus sine oculis-related homeobox 1 homolog (Drosophila) (Six1), mRNA.	1.58557	2.8219	1.77974
Etfa	Mus musculus electron transferring flavoprotein, alpha polypeptide (Etfa), nuclear gene encoding mitochondrial protein, mRNA.	2.67895	4.76783	1.77974
Ndfip1	Mus musculus Nedd4 family interacting protein 1 (Ndfip1), mRNA.	1.20025	2.13366	1.77768
Cdh13	Mus musculus cadherin 13 (Cdh13), mRNA.	1.23685	2.19872	1.77768
Krcc1	Mus musculus lysine-rich coiled-coil 1 (Krcc1), mRNA.	1.85104	3.28676	1.77563
Hs6st2	Mus musculus heparan sulfate 6-O-sulfotransferase 2 (Hs6st2), transcript variant 2, mRNA.	1.40444	2.4909	1.77359
Abcb7	PREDICTED: Mus musculus ATP-binding cassette, sub-family B (MDR/TAP), member 7, transcript variant 5 (Abcb7), mRNA.	1.28491	2.27626	1.77153
BC003331		1.87038	3.30962	1.76949
Pde1a	Mus musculus phosphodiesterase 1A, calmodulin-dependent (Pde1a), transcript variant 9, mRNA.	1.21982	2.15348	1.76541
Fkbp7	Mus musculus FK506 binding protein 7 (Fkbp7), mRNA.	1.62826	2.87454	1.76541
Acadsb	Mus musculus acyl-Coenzyme A dehydrogenase, short/branched chain (Acadsb), nuclear gene encoding mitochondrial protein, mRNA.	1.72309	3.03845	1.76337
Htatsf1	Mus musculus HIV TAT specific factor 1 (Htatsf1), mRNA.	1.2643	2.22942	1.76336
mt-Atp6		1.16205	2.04675	1.76133
Rg9mtd1	Mus musculus RNA (guanine-9-) methyltransferase domain containing 1 (Rg9mtd1), mRNA.	1.36446	2.4005	1.7593
Gm3154	predicted gene 13154	1.97019	3.45017	1.75119
Rnuxa	Mus musculus RNA U, small nuclear RNA export adaptor (Rnuxa), mRNA.	1.29235	2.25532	1.74513
Map2k4	Mus musculus mitogen-activated protein kinase kinase 4 (Map2k4), mRNA.	1.39152	2.42279	1.74111
Nsmce2	Mus musculus non-SMC element 2 homolog (MMS21, S. cerevisiae) (Nsmce2), mRNA.	1.30285	2.26577	1.73909
Prps1	Mus musculus phosphoribosyl pyrophosphate synthetase 1 (Prps1), mRNA.	1.54043	2.67586	1.73709
Nasp	Mus musculus nuclear autoantigenic sperm protein (histone-binding) (Nasp), transcript variant 2, mRNA.	1.90088	3.29436	1.73307
Smarca1	Mus musculus SWI/SNF related, matrix associated, actin dependent regulator of chromatin, subfamily a, member 1 (Smarca1), mRNA.	1.54578	2.67586	1.73107
Hspd1	Mus musculus heat shock protein 1 (chaperonin) (Hspd1), mRNA.	1.8025	3.11666	1.72908
Slc39a6	Mus musculus solute carrier family 39 (metal ion transporter), member 6 (Slc39a6), mRNA.	1.35191	2.33486	1.72708
Smc6	Mus musculus structural maintenance of chromosomes 6 (Smc6), mRNA.	1.25122	2.15846	1.72508
Hcfc1	Mus musculus host cell factor C1 (Hcfc1), mRNA.	1.17555	2.02792	1.72508
Ankrd46	Mus musculus ankyrin repeat domain 46 (Ankrd46), mRNA.	1.3333	2.2974	1.72309
2610204L23Rik		1.30285	2.24492	1.72308
Ipp	Mus musculus IAP promoted placental gene (Ipp), mRNA.	1.29385	2.22427	1.71911
2810453I06Rik		1.57462	2.7007	1.71514
Rsl1d1	Mus musculus ribosomal L1 domain containing 1 (Rsl1d1), mRNA.	1.73307	2.9622	1.70922
Tcte3	Mus musculus t-complex-associated testis expressed 3 (Tcte3), transcript variant 2, mRNA.	1.55473	2.65737	1.70922
6720467C03Rik	Mus musculus RIKEN cDNA 6720467C03 gene (6720467C03Rik), mRNA.	1.50873	2.57874	1.70921
Arpc5l	Mus musculus actin related protein 2/3 complex, subunit 5-like (Arpc5l), mRNA.	1.84038	3.13834	1.70527
1110001C23Rik		1.19472	2.03731	1.70526
Acn9		2.14107	3.63008	1.69545
D430022H17Rik		1.38191	2.34026	1.6935
Bcl2l13	Mus musculus BCL2-like 13 (apoptosis facilitator) (Bcl2l13), nuclear gene encoding mitochondrial protein, mRNA.	1.49831	2.53737	1.69349
Snx7	Mus musculus sorting nexin 7 (Snx7), mRNA.	1.23257	2.08012	1.68763
Commd2	Mus musculus COMM domain containing 2 (Commd2), mRNA.	1.30737	2.20381	1.68568
Rrp1	Mus musculus ribosomal RNA processing 1 homolog (S. cerevisiae) (Rrp1), mRNA.	1.32715	2.22942	1.67986
Mrps18c	Mus musculus mitochondrial ribosomal protein S18C (Mrps18c), nuclear gene encoding mitochondrial protein, mRNA.	2.88452	4.84557	1.67985
2310005N03Rik	Mus musculus RIKEN cDNA 2310005N03 gene (2310005N03Rik), mRNA.	2.4144	4.04648	1.67598
Rgs10	Mus musculus regulator of G-protein signalling 10 (Rgs10), mRNA.	1.7593	2.94854	1.67597
Yme1l1	Mus musculus YME1-like 1 (S. cerevisiae) (Yme1l1), nuclear gene encoding mitochondrial protein, mRNA.	1.21841	2.02792	1.6644
Cdc16	Mus musculus CDC16 cell division cycle 16 homolog (S. cerevisiae) (Cdc16), mRNA.	1.3566	2.25532	1.66248
4930461P20Rik	PREDICTED: Mus musculus RIKEN cDNA 4930461P20 gene (4930461P20Rik), mRNA.	1.81294	3.01049	1.66056
Zfp277	Mus musculus zinc finger protein 277 (Zfp277), transcript variant 1, mRNA.	1.27751	2.11893	1.65864
Dynlt3	Mus musculus dynein light chain Tctex-type 3 (Dynlt3), mRNA.	3.12387	5.18137	1.65864
Slc17a8	Mus musculus solute carrier family 17 (sodium-dependent inorganic phosphate cotransporter), member 8 (Slc17a8), mRNA.	1.48796	2.46798	1.65863
Bcap29	Mus musculus B-cell receptor-associated protein 29 (Bcap29), mRNA.	2.14851	3.56359	1.65863
Bbs4	Mus musculus Bardet-Biedl syndrome 4 (human) (Bbs4), mRNA.	1.45565	2.40605	1.6529
Picalm		1.64528	2.71321	1.64909
Akr1e1	Mus musculus aldo-keto reductase family 1, member E1 (Akr1e1), mRNA.	1.43561	2.36199	1.64529
Upf3a	Mus musculus UPF3 regulator of nonsense transcripts homolog A (yeast) (Upf3a), mRNA.	1.92741	3.16017	1.63959
Tmem5	Mus musculus transmembrane protein 5 (Tmem5), mRNA.	1.67404	2.74473	1.63958
2610028A01Rik	Mus musculus RIKEN cDNA 2610028A01 gene (2610028A01Rik), mRNA.	1.61702	2.65124	1.63958
Pabpc1	Mus musculus poly A binding protein, cytoplasmic 1 (Pabpc1), mRNA.	2.26315	3.6978	1.63392
Gcap27		1.53156	2.50244	1.63392
Cmas	Mus musculus cytidine monophospho-N-acetylneuraminic acid synthetase (Cmas), mRNA.	1.81714	2.96905	1.63391
Tigd2	Mus musculus tigger transposable element derived 2 (Tigd2), mRNA.	1.40444	2.2868	1.62826
1810022K09Rik		2.59968	4.22807	1.62638
Snap29	Mus musculus synaptosomal-associated protein 29 (Snap29), mRNA.	1.67404	2.71321	1.62076
4930403O06Rik		1.69741	2.75108	1.62075
Trappc6b	Mus musculus trafficking protein particle complex 6B (Trappc6b), mRNA.	1.67211	2.70695	1.61888
Faim	Mus musculus Fas apoptotic inhibitory molecule (Faim), mRNA.	1.4456	2.32409	1.6077
Lhfp	Mus musculus lipoma HMGIC fusion partner (Lhfp), mRNA.	1.70921	2.74473	1.60585
Adam9	Mus musculus a disintegrin and metallopeptidase domain 9 (meltrin gamma) (Adam9), mRNA.	1.40444	2.25012	1.60215
Rabif	Mus musculus RAB interacting factor (Rabif), mRNA.	1.95206	3.12387	1.60029
Ncl	Mus musculus nucleolin (Ncl), mRNA.	2.45945	3.93583	1.60029
Trim32	Mus musculus tripartite motif-containing 32 (Trim32), mRNA.	1.48796	2.37841	1.59844
Srp9	Mus musculus signal recognition particle 9 (Srp9), mRNA.	1.36604	2.1785	1.59476
Sparc	Mus musculus secreted acidic cysteine rich glycoprotein (Sparc), mRNA.	2.20127	3.50642	1.59291
Tceb1	Mus musculus transcription elongation factor B (SIII), polypeptide 1 (Tceb1), mRNA.	1.60956	2.56093	1.59107
Edg2		1.51047	2.39496	1.58557
6330406I15Rik	Mus musculus RIKEN cDNA 6330406I15 gene (6330406I15Rik), mRNA.	1.45397	2.30271	1.58374
Ccdc181	coiled-coil domain containing 181	1.95658	3.09513	1.58191
Mageh1	Mus musculus melanoma antigen, family H, 1 (Mageh1), mRNA.	1.40932	2.22427	1.57826
Mtch2	Mus musculus mitochondrial carrier homolog 2 (C. elegans) (Mtch2), nuclear gene encoding mitochondrial protein, mRNA.	1.81294	2.85469	1.57462
Rnf6	Mus musculus ring finger protein (C3H2C3 type) 6 (Rnf6), mRNA.	1.55473	2.44528	1.5728
Topors	Mus musculus topoisomerase I binding, arginine/serine-rich (Topors), mRNA.	1.37713	2.16345	1.57098
Hsp90b1	Mus musculus heat shock protein 90, beta (Grp94), member 1 (Hsp90b1), mRNA.	1.60029	2.50822	1.56735
2410016F19Rik	Mus musculus RIKEN cDNA 2410016F19 gene (2410016F19Rik), mRNA.	1.96564	3.07375	1.56374
Atg3	Mus musculus autophagy-related 3 (yeast) (Atg3), mRNA.	1.77358	2.76383	1.55833
Ccdc90b	Mus musculus coiled-coil domain containing 90B (Ccdc90b), mRNA.	1.72508	2.68825	1.55833
Pdlim3	Mus musculus PDZ and LIM domain 3 (Pdlim3), mRNA.	1.39474	2.17347	1.55833
2900057D21Rik		1.94531	3.03143	1.55833
Psip1	Mus musculus PC4 and SFRS1 interacting protein 1 (Psip1), mRNA.	1.54756	2.40605	1.55474
Dcun1d5	Mus musculus DCN1, defective in cullin neddylation 1, domain containing 5 (S. cerevisiae) (Dcun1d5), mRNA.	2.18102	3.38698	1.55293
Snx16	Mus musculus sorting nexin 16 (Snx16), mRNA.	1.55473	2.41162	1.55115
D15Ertd621e		1.3333	2.06575	1.54935
Rnase4	Mus musculus ribonuclease, RNase A family 4 (Rnase4), transcript variant 1, mRNA.	2.08252	3.21912	1.54578
AI551093		1.34568	2.08012	1.54578
Hspa8	Mus musculus heat shock protein 8 (Hspa8), mRNA.	2.69136	4.16024	1.54578
4931406C07Rik	Mus musculus RIKEN cDNA 4931406C07 gene (4931406C07Rik), mRNA.	1.61328	2.48515	1.54043
Cox6c	Mus musculus cytochrome c oxidase, subunit VIc (Cox6c), mRNA.	1.5966	2.45661	1.53865
1600012H06Rik	RIKEN cDNA 1600012H06 gene	1.61515	2.48515	1.53865
Gpbp1	Mus musculus GC-rich promoter binding protein 1 (Gpbp1), mRNA.	1.31342	2.01857	1.53688
Dbt	Mus musculus dihydrolipoamide branched chain transacylase E2 (Dbt), mRNA.	1.99538	3.05958	1.53333
3300001P08Rik	Mus musculus RIKEN cDNA 3300001P08 gene (3300001P08Rik), mRNA.	1.7818	2.72578	1.52979
Med1	Mus musculus mediator complex subunit 1 (Med1), transcript variant 2, mRNA.	1.46409	2.23974	1.52978
Mrg1		1.33947	2.04675	1.52803
Antxr1	Mus musculus anthrax toxin receptor 1 (Antxr1), mRNA.	1.41585	2.16345	1.52802
C030048B08Rik	Mus musculus RIKEN cDNA C030048B08 gene (C030048B08Rik), mRNA.	1.66632	2.54324	1.52626
Ufsp2	Mus musculus UFM1-specific peptidase 2 (Ufsp2), mRNA.	1.79419	2.7384	1.52626
Zfp810	Mus musculus zinc finger protein 810 (Zfp810), mRNA.	1.33484	2.03731	1.52626
Scfd1	Mus musculus Sec1 family domain containing 1 (Scfd1), mRNA.	1.37078	2.08975	1.5245
4933424B01Rik	Mus musculus RIKEN cDNA 4933424B01 gene (4933424B01Rik), mRNA.	1.43893	2.18859	1.52098
Armcx3	Mus musculus armadillo repeat containing, X-linked 3 (Armcx3), mRNA.	1.60399	2.43964	1.52098
Tor1b	Mus musculus torsin family 1, member B (Tor1b), mRNA.	1.39797	2.12383	1.51922
Exosc8	Mus musculus exosome component 8 (Exosc8), mRNA.	2.10429	3.19688	1.51922
Rala	Mus musculus v-ral simian leukemia viral oncogene homolog A (ras related) (Rala), mRNA.	1.91189	2.90123	1.51747
Cltc		1.33947	2.02792	1.51397
Mre11a	Mus musculus meiotic recombination 11 homolog A (S. cerevisiae) (Mre11a), mRNA.	1.80876	2.73208	1.51047
C1qtnf3	Mus musculus C1q and tumor necrosis factor related protein 3 (C1qtnf3), mRNA.	1.9611	2.95536	1.50699
Serf1	Mus musculus small EDRK-rich factor 1 (Serf1), mRNA.	3.66802	5.52765	1.50698
Omd	Mus musculus osteomodulin (Omd), mRNA.	1.33793	2.00926	1.50177
Pa2g4	Mus musculus proliferation-associated 2G4 (Pa2g4), mRNA.	1.63769	2.45661	1.50005
Chmp2a	Mus musculus chromatin modifying protein 2A (Chmp2a), mRNA.	1.49312	2.23457	1.49658
E230025L24Rik		1.58191	2.36745	1.49658
Ddx52	Mus musculus DEAD (Asp-Glu-Ala-Asp) box polypeptide 52 (Ddx52), mRNA.	1.34412	2.00926	1.49485
Triqk	triple QxxK/R motif containing	1.84676	2.75745	1.49313
Ccdc55	Mus musculus coiled-coil domain containing 55 (Ccdc55), mRNA.	1.9141	2.8481	1.48796
Mospd1	Mus musculus motile sperm domain containing 1 (Mospd1), mRNA.	1.35035	2.00926	1.48795
Cbwd1	Mus musculus COBW domain containing 1 (Cbwd1), mRNA.	2.56982	3.81937	1.48624
Ndufa12l	PREDICTED: Mus musculus Ndufa12-like (Ndufa12l), mRNA.	3.23777	4.8121	1.48624
Rab9	Mus musculus RAB9, member RAS oncogene family (Rab9), mRNA.	1.37078	2.03261	1.48281
Wwox	Mus musculus WW domain-containing oxidoreductase (Wwox), mRNA.	1.6358	2.42279	1.4811
Cyr61	Mus musculus cysteine rich protein 61 (Cyr61), mRNA.	1.63392	2.41719	1.47938
Mfap1b	Mus musculus microfibrillar-associated protein 1B (Mfap1b), mRNA.	1.79834	2.65737	1.47768
Zfp553	Mus musculus zinc finger protein 553 (Zfp553), mRNA.	1.72309	2.54324	1.47598
Snurf	Mus musculus SNRPN upstream reading frame (Snurf), mRNA.	1.73508	2.56093	1.47597
Gpx8	Mus musculus glutathione peroxidase 8 (putative) (Gpx8), mRNA.	2.07532	3.05252	1.47087
Ccdc47	Mus musculus coiled-coil domain containing 47 (Ccdc47), mRNA.	1.46409	2.15348	1.47087
2510008P16Rik		1.54399	2.26577	1.46748
2610208M17Rik	Mus musculus RIKEN cDNA 2610208M17 gene (2610208M17Rik), mRNA.	1.96791	2.88786	1.46748
Fip1l1	Mus musculus FIP1 like 1 (S. cerevisiae) (Fip1l1), mRNA.	1.49312	2.18859	1.46578
Ywhab	Mus musculus tyrosine 3-monooxygenase/tryptophan 5-monooxygenase activation protein, beta polypeptide (Ywhab), mRNA.	1.77358	2.59668	1.46409
Ift20	Mus musculus intraflagellar transport 20 homolog (Chlamydomonas) (Ift20), mRNA.	2.27101	3.32495	1.46408
Sumo2	Mus musculus SMT3 suppressor of mif two 3 homolog 2 (yeast) (Sumo2), mRNA.	1.81924	2.66352	1.46408
Sdcbp	Mus musculus syndecan binding protein (Sdcbp), transcript variant 1, mRNA.	1.64718	2.40605	1.46071
Tfrc	Mus musculus transferrin receptor (Tfrc), mRNA.	1.84676	2.68825	1.45566
Zfp68	Mus musculus zinc finger protein 68 (Zfp68), transcript variant 1, mRNA.	1.7211	2.50244	1.45398
Rpap2	Mus musculus RNA polymerase II associated protein 2 (Rpap2), mRNA.	1.90088	2.76383	1.45397
Hmgn3	Mus musculus high mobility group nucleosomal binding domain 3 (Hmgn3), transcript variant 1, mRNA.	1.8489	2.68825	1.45397
Rnf113a2	Mus musculus ring finger protein 113A2 (Rnf113a2), mRNA.	1.79419	2.6087	1.45397
Rrbp1	Mus musculus ribosome binding protein 1 (Rrbp1), transcript variant 2, mRNA.	2.13366	3.09513	1.45062
DKFZp434J1813		1.57644	2.2868	1.45061
1190028F09		1.48452	2.14851	1.44728
2810407C02Rik	Mus musculus RIKEN cDNA 2810407C02 gene (2810407C02Rik), mRNA.	1.40444	2.03261	1.44727
Sybl1	Mus musculus synaptobrevin like 1 (Sybl1), mRNA.	2.04911	2.95536	1.44227
Psma4	Mus musculus proteasome (prosome, macropain) subunit, alpha type 4 (Psma4), mRNA.	1.53333	2.20891	1.4406
AU022870	Mus musculus expressed sequence AU022870 (AU022870), mRNA.	2	2.88119	1.4406
Rnf141	Mus musculus ring finger protein 141 (Rnf141), mRNA.	1.39474	2.00463	1.43728
Gfer	Mus musculus growth factor, erv1 (S. cerevisiae)-like (augmenter of liver regeneration) (Gfer), mRNA.	1.8025	2.58471	1.43396
Psmd10	Mus musculus proteasome (prosome, macropain) 26S subunit, non-ATPase, 10 (Psmd10), mRNA.	1.88122	2.69447	1.4323
Tipin	Mus musculus timeless interacting protein (Tipin), mRNA.	2.10186	3.01049	1.4323
Taf12		1.88775	2.7007	1.43064
mt-Nd1		1.52098	2.17347	1.42899
Cyp51	Mus musculus cytochrome P450, family 51 (Cyp51), mRNA.	1.82134	2.60268	1.42899
Sh3glb1	Mus musculus SH3-domain GRB2-like B1 (endophilin) (Sh3glb1), mRNA.	1.64909	2.35653	1.42899
Clpx	Mus musculus caseinolytic peptidase X (E.coli) (Clpx), transcript variant 1, mRNA.	1.4811	2.10916	1.42405
Dnaja2	Mus musculus DnaJ (Hsp40) homolog, subfamily A, member 2 (Dnaja2), mRNA.	1.45902	2.07053	1.41912
Anxa1	Mus musculus annexin A1 (Anxa1), mRNA.	1.61142	2.28153	1.41585
Hprt1	Mus musculus hypoxanthine guanine phosphoribosyl transferase 1 (Hprt1), mRNA.	1.52979	2.16345	1.41421
Hat1	Mus musculus histone aminotransferase 1 (Hat1), mRNA.	1.64528	2.32409	1.41258
Kbtbd7	Mus musculus kelch repeat and BTB (POZ) domain containing 7 (Kbtbd7), mRNA.	1.58191	2.23457	1.41258
Gfod2	Mus musculus glucose-fructose oxidoreductase domain containing 2 (Gfod2), mRNA.	1.7211	2.42839	1.41095
Arl1	Mus musculus ADP-ribosylation factor-like 1 (Arl1), mRNA.	2.06575	2.91467	1.41095
Mrps31	Mus musculus mitochondrial ribosomal protein S31 (Mrps31), nuclear gene encoding mitochondrial protein, mRNA.	2.40883	3.39482	1.40932
BC002163	Mus musculus cDNA sequence BC002163 (BC002163), non-coding RNA.	1.92964	2.71948	1.40932
Rexo2	Mus musculus REX2, RNA exonuclease 2 homolog (S. cerevisiae) (Rexo2), mRNA.	3.16748	4.45883	1.40769
Wdr70	PREDICTED: Mus musculus WD repeat domain 70, transcript variant 3 (Wdr70), mRNA.	2.14355	3.01049	1.40444
Dstn	Mus musculus destrin (Dstn), mRNA.	1.80458	2.53151	1.40283
Rnaseh2b	Mus musculus ribonuclease H2, subunit B (Rnaseh2b), mRNA.	1.75321	2.45661	1.40121
Taf9	Mus musculus TAF9 RNA polymerase II, TATA box binding protein (TBP)-associated factor (Taf9), transcript variant 1, mRNA.	2.18859	3.06666	1.4012
Syap1	Mus musculus synapse associated protein 1 (Syap1), mRNA.	1.48968	2.08493	1.39958
Ptpn2		1.77358	2.47942	1.39797
Cir1	corepressor interacting with RBPJ, 1	1.86822	2.6087	1.39636
Pdha1	Mus musculus pyruvate dehydrogenase E1 alpha 1 (Pdha1), nuclear gene encoding mitochondrial protein, mRNA.	1.50177	2.09459	1.39475
Ift74	Mus musculus intraflagellar transport 74 homolog (Chlamydomonas) (Ift74), mRNA.	1.53333	2.1386	1.39474
2810008M24Rik	Mus musculus RIKEN cDNA 2810008M24 gene (2810008M24Rik), mRNA.	1.75727	2.44528	1.39152
Klra4	Mus musculus killer cell lectin-like receptor, subfamily A, member 4 (Klra4), mRNA.	1.55833	2.16845	1.39152
Raet1b	Mus musculus retinoic acid early transcript beta (Raet1b), mRNA.	2.30005	3.19688	1.38992
Snx10	Mus musculus sorting nexin 10 (Snx10), mRNA.	1.67211	2.32409	1.38991
Fundc1	Mus musculus FUN14 domain containing 1 (Fundc1), mRNA.	1.75727	2.43401	1.38511
Eif2a	Mus musculus eukaryotic translation initiation factor 2a (Eif2a), mRNA.	1.81714	2.51403	1.38351
Sypl	Mus musculus synaptophysin-like protein (Sypl), transcript variant 2, mRNA.	2.20127	3.04547	1.38351
Ubxn1	Mus musculus UBX domain protein 1 (Ubxn1), mRNA.	2.90123	4.00925	1.38191
Mrps22	Mus musculus mitochondrial ribosomal protein S22 (Mrps22), mRNA.	2.07053	2.86129	1.38191
Naca	Mus musculus nascent polypeptide-associated complex alpha polypeptide (Naca), mRNA.	3.20058	4.41782	1.38032
Ociad1	Mus musculus OCIA domain containing 1 (Ociad1), mRNA.	2.06337	2.8481	1.38031
Snrpd1	Mus musculus small nuclear ribonucleoprotein D1 (Snrpd1), mRNA.	2.1116	2.91467	1.38031
Cdca3	Mus musculus cell division cycle associated 3 (Cdca3), mRNA.	1.87905	2.59068	1.37872
Zfp3	Mus musculus zinc finger protein 3 (Zfp3), mRNA.	1.92964	2.65124	1.37396
6330444G18Rik		1.46071	2.00463	1.37237
Utp11l	Mus musculus UTP11-like, U3 small nucleolar ribonucleoprotein, (yeast) (Utp11l), mRNA.	1.61888	2.21914	1.37079
Asb13	Mus musculus ankyrin repeat and SOCS box-containing 13 (Asb13), mRNA.	1.80876	2.47369	1.36762
1700052K11Rik	PREDICTED: Mus musculus RIKEN cDNA 1700052K11 gene (1700052K11Rik), misc RNA.	1.54043	2.10429	1.36604
Akt3	Mus musculus thymoma viral proto-oncogene 3 (Akt3), mRNA.	2.10916	2.88119	1.36604
Adal	Mus musculus adenosine deaminase-like (Adal), mRNA. XM_900859 XM_900862 XM_917792 XM_925262 XM_925265 XM_925269 XM_925272 XM_925275 XM_986097 XM_986134 XM_986169 XM_986201 XM_986236 XM_986298	1.70724	2.32947	1.36447
Rfwd2	Mus musculus ring finger and WD repeat domain 2 (Rfwd2), mRNA.	1.57826	2.15348	1.36446
Clns1a	Mus musculus chloride channel, nucleotide-sensitive, 1A (Clns1a), mRNA.	1.73708	2.36199	1.35975
Vps36	Mus musculus vacuolar protein sorting 36 (yeast) (Vps36), mRNA.	2.00231	2.71948	1.35817
Cfdp1	Mus musculus craniofacial development protein 1 (Cfdp1), mRNA.	3.33264	4.52108	1.35661
Sgk3	Mus musculus serum/glucocorticoid regulated kinase 3 (Sgk3), transcript variant 1, mRNA.	2.12383	2.87454	1.35347
Nqo2	Mus musculus NAD(P)H dehydrogenase, quinone 2 (Nqo2), mRNA.	1.76745	2.38392	1.34879
Rbbp9	Mus musculus retinoblastoma binding protein 9 (Rbbp9), mRNA.	2.29474	3.08799	1.34568
Cetn3	Mus musculus centrin 3 (Cetn3), mRNA.	2.73524	3.68075	1.34568
Anxa4		1.67404	2.25012	1.34413
Nap1l1	Mus musculus nucleosome assembly protein 1-like 1 (Nap1l1), mRNA.	1.85961	2.49666	1.34257
Slc25a3	Mus musculus solute carrier family 25 (mitochondrial carrier, phosphate carrier), member 3 (Slc25a3), mRNA.	1.85532	2.4909	1.34257
Ube2n	Mus musculus ubiquitin-conjugating enzyme E2N (Ube2n), mRNA.	1.63014	2.18354	1.33948
6330578E17Rik	Mus musculus RIKEN cDNA 6330578E17 gene (6330578E17Rik), mRNA.	1.7593	2.3511	1.33638
Zfp35	Mus musculus zinc finger protein 35 (Zfp35), mRNA.	2.37019	3.16017	1.3333
Zfp37	Mus musculus zinc finger protein 37 (Zfp37), mRNA.	1.60956	2.14355	1.33176
Suclg1	Mus musculus succinate-CoA ligase, GDP-forming, alpha subunit (Suclg1), mRNA.	2.49666	3.32495	1.33176
Mnd1	Mus musculus meiotic nuclear divisions 1 homolog (S. cerevisiae) (Mnd1), mRNA.	1.52274	2.02792	1.33176
Mki67ip	Mus musculus Mki67 (FHA domain) interacting nucleolar phosphoprotein (Mki67ip), mRNA.	1.83401	2.43964	1.33022
Dnajc8		2.64818	3.52266	1.33022
Tmem167	Mus musculus transmembrane protein 167 (Tmem167), mRNA.	2.09943	2.78949	1.32869
1110033M05Rik	PREDICTED: Mus musculus RIKEN cDNA 1110033M05 gene, transcript variant 6 (1110033M05Rik), mRNA.	1.63769	2.16845	1.32409
Nudt5	Mus musculus nudix (nucleoside diphosphate linked moiety X)-type motif 5 (Nudt5), mRNA.	2.48228	3.28676	1.32409
Snai2	Mus musculus snail homolog 2 (Drosophila) (Snai2), mRNA.	1.9141	2.53151	1.32256
Aagab	alpha- and gamma-adaptin binding protein	1.5728	2.08012	1.32256
Tnfrsf10b	Mus musculus tumor necrosis factor receptor superfamily, member 10b (Tnfrsf10b), mRNA.	1.55114	2.04675	1.31951
Akr1b3	Mus musculus aldo-keto reductase family 1, member B3 (aldose reductase) (Akr1b3), mRNA.	1.57644	2.08012	1.3195
Dnajc2	Mus musculus DnaJ (Hsp40) homolog, subfamily C, member 2 (Dnajc2), mRNA.	2.07292	2.73208	1.31799
Ndufc1	Mus musculus NADH dehydrogenase (ubiquinone) 1, subcomplex unknown, 1 (Ndufc1), mRNA.	2.09701	2.76383	1.31799
Ttc30b	Mus musculus tetratricopeptide repeat domain 30B (Ttc30b), mRNA. XM_911984 XM_986297	2.08734	2.75108	1.31798
Pin4		1.77154	2.33486	1.31798
S100a10	Mus musculus S100 calcium binding protein A10 (calpactin) (S100a10), mRNA.	2.37567	3.12387	1.31494
Tyms	Mus musculus thymidylate synthase (Tyms), mRNA.	2.64207	3.47417	1.31494
Timm8a1	Mus musculus translocase of inner mitochondrial membrane 8 homolog a1 (yeast) (Timm8a1), mRNA.	2.38943	3.13834	1.31343
Rdh11		1.75321	2.30271	1.31343
Coq7	Mus musculus demethyl-Q 7 (Coq7), mRNA.	2.34567	3.08086	1.31342
Dnajb11		1.68763	2.21402	1.31191
Trnt1	Mus musculus tRNA nucleotidyl transferase, CCA-adding, 1 (Trnt1), mRNA.	1.65099	2.15348	1.30436
4930432O21Rik	Mus musculus RIKEN cDNA 4930432O21 gene (4930432O21Rik), mRNA.	1.67211	2.1785	1.30284
Rerg	Mus musculus RAS-like, estrogen-regulated, growth-inhibitor (Rerg), mRNA.	1.58008	2.05623	1.30135
Zbtb9	Mus musculus zinc finger and BTB domain containing 9 (Zbtb9), mRNA.	1.57644	2.05148	1.30134
Ythdf2	Mus musculus YTH domain family 2 (Ythdf2), mRNA.	1.73107	2.25012	1.29984
AW146242	Mus musculus expressed sequence AW146242 (AW146242), mRNA.	1.64148	2.13366	1.29984
Dpy30	dpy-30 homolog (C. elegans)	2.56389	3.33264	1.29984
Cinp	cyclin-dependent kinase 2 interacting protein	1.5874	2.06098	1.29834
Scp2	Mus musculus sterol carrier protein 2, liver (Scp2), mRNA.	2.38667	3.09513	1.29684
Nola1	Mus musculus nucleolar protein family A, member 1 (H/ACA small nucleolar RNPs) (Nola1), mRNA.	1.82978	2.37293	1.29684
Pdcl3	Mus musculus phosducin-like 3 (Pdcl3), mRNA.	1.88775	2.44528	1.29534
Pop4	Mus musculus processing of precursor 4, ribonuclease P/MRP family, (S. cerevisiae) (Pop4), mRNA.	1.83825	2.37841	1.29384
Mrpl20	Mus musculus mitochondrial ribosomal protein L20 (Mrpl20), nuclear gene encoding mitochondrial protein, mRNA.	2.59068	3.34808	1.29236
Scye1	Mus musculus small inducible cytokine subfamily E, member 1 (Scye1), mRNA.	2.07053	2.66968	1.28937
Ppp2r5e	Mus musculus protein phosphatase 2, regulatory subunit B (B56), epsilon isoform (Ppp2r5e), mRNA.	2.60268	3.34808	1.2864
Igtp	Mus musculus interferon gamma induced GTPase (Igtp), mRNA.	1.75119	2.25012	1.28491
D1Bwg0212e	Mus musculus DNA segment, Chr 1, Brigham & Women's Genetics 0212 expressed (D1Bwg0212e), mRNA.	1.64718	2.11404	1.28343
Cdc37l1	Mus musculus cell division cycle 37 homolog (S. cerevisiae)-like 1 (Cdc37l1), mRNA.	2.01391	2.58471	1.28343
Cops2	Mus musculus COP9 (constitutive photomorphogenic) homolog, subunit 2 (Arabidopsis thaliana) (Cops2), mRNA.	1.81294	2.32409	1.28195
Timm8b	Mus musculus translocase of inner mitochondrial membrane 8 homolog b (yeast) (Timm8b), mRNA.	2.69758	3.45815	1.28195
Obfc1	Mus musculus oligonucleotide/oligosaccharide-binding fold containing 1 (Obfc1), mRNA.	1.93411	2.47942	1.28194
5730469M10Rik	Mus musculus RIKEN cDNA 5730469M10 gene (5730469M10Rik), mRNA.	2.67277	3.42634	1.28194
2700092H06Rik		1.82766	2.34026	1.28047
Nsdhl	Mus musculus NAD(P) dependent steroid dehydrogenase-like (Nsdhl), mRNA.	1.61888	2.07053	1.27899
Eef1b2	Mus musculus eukaryotic translation elongation factor 1 beta 2 (Eef1b2), mRNA.	2.90123	3.6978	1.27456
Aabp3-pending		1.71317	2.1785	1.27162
Rsrc2	Mus musculus arginine/serine-rich coiled-coil 2 (Rsrc2), transcript variant 3, mRNA.	1.88557	2.39496	1.27015
Rcan2	Mus musculus regulator of calcineurin 2 (Rcan2), transcript variant 1, mRNA.	2.38392	3.02444	1.26868
Il17ra	Mus musculus interleukin 17 receptor A (Il17ra), mRNA.	1.66248	2.10916	1.26868
Etaa1	Mus musculus Ewing's tumor-associated antigen 1 (Etaa1), mRNA.	1.88557	2.38943	1.26722
Fbxo36	Mus musculus F-box protein 36 (Fbxo36), mRNA.	2.00463	2.53151	1.26283
Sar1b	Mus musculus SAR1 gene homolog B (S. cerevisiae) (Sar1b), mRNA.	1.86176	2.34567	1.25992
Cggbp1	Mus musculus CGG triplet repeat binding protein 1 (Cggbp1), mRNA.	2.00463	2.52567	1.25992
Ccdc91	Mus musculus coiled-coil domain containing 91 (Ccdc91), mRNA.	1.62076	2.04202	1.25992
D030070L09Rik	Mus musculus RIKEN cDNA D030070L09 gene (D030070L09Rik), mRNA.	1.94306	2.44528	1.25847
Tceal8	Mus musculus transcription elongation factor A (SII)-like 8 (Tceal8), mRNA.	1.81294	2.27101	1.25267
Rps3a	Mus musculus ribosomal protein S3a (Rps3a), mRNA.	3.72782	4.66971	1.25267
Mtrf1	Mus musculus mitochondrial translational release factor 1 (Mtrf1), mRNA.	2.58172	3.23403	1.25266
Vti1a	Mus musculus vesicle transport through interaction with t-SNAREs homolog 1A (yeast) (Vti1a), mRNA.	2.02558	2.53737	1.25266
Wbp5		1.71912	2.14851	1.24977
Actr3	Mus musculus ARP3 actin-related protein 3 homolog (yeast) (Actr3), mRNA.	2.00926	2.50244	1.24545
5730449L18Rik	Mus musculus RIKEN cDNA 5730449L18 gene (5730449L18Rik), mRNA.	2.97248	3.6978	1.24401
4932441N08Rik		1.68763	2.09943	1.24401
Tbca	Mus musculus tubulin cofactor a (Tbca), mRNA.	2.41999	3.01049	1.24401
Vapb	Mus musculus vesicle-associated membrane protein, associated protein B and C (Vapb), mRNA.	2.20636	2.74473	1.24401
Mllt11	Mus musculus myeloid/lymphoid or mixed-lineage leukemia (trithorax homolog, Drosophila); translocated to, 11 (Mllt11), mRNA.	1.76949	2.19365	1.23971
Ovca2	Mus musculus candidate tumor suppressor in ovarian cancer 2 (Ovca2), mRNA.	1.74715	2.15846	1.23542
Srp14	Mus musculus signal recognition particle 14 (Srp14), mRNA.	2.37841	2.93494	1.23399
Med14	Mus musculus mediator complex subunit 14 (Med14), transcript variant 2, mRNA.	1.72708	2.12874	1.23257
Gbp2	Mus musculus guanylate binding protein 2 (Gbp2), mRNA.	2.08975	2.57279	1.23115
Pbdc1	polysaccharide biosynthesis domain containing 1	2.09459	2.57874	1.23114
Cops5	Mus musculus COP9 (constitutive photomorphogenic) homolog, subunit 5 (Arabidopsis thaliana) (Cops5), mRNA.	2.43964	2.99661	1.2283
Slc38a9	solute carrier family 38, member 9	2.43964	2.99661	1.2283
Ptrf	Mus musculus polymerase I and transcript release factor (Ptrf), mRNA.	2.10186	2.57874	1.22688
4632417K18Rik	Mus musculus RIKEN cDNA 4632417K18 gene (4632417K18Rik), mRNA.	2.56982	3.15287	1.22688
Bnip3l	Mus musculus BCL2/adenovirus E1B interacting protein 3-like (Bnip3l), mRNA.	2.01624	2.47369	1.22688
6330577E15Rik		1.68179	2.06098	1.22547
Nol5	Mus musculus nucleolar protein 5 (Nol5), mRNA.	1.81085	2.21402	1.22264
Tubb6	Mus musculus tubulin, beta 6 (Tubb6), mRNA.	2.20891	2.7007	1.22264
Cav1	Mus musculus caveolin 1, caveolae protein (Cav1), mRNA.	2.00694	2.45094	1.22123
Gins4	Mus musculus GINS complex subunit 4 (Sld5 homolog) (Gins4), mRNA.	2.49378	3.03845	1.21841
Hebp2	Mus musculus heme binding protein 2 (Hebp2), mRNA.	2.15099	2.62079	1.21841
Coa6	cytochrome c oxidase assembly factor 6	2.29209	2.78949	1.21701
Mina	Mus musculus myc induced nuclear antigen (Mina), mRNA.	1.79005	2.17347	1.2142
Btbd1	Mus musculus BTB (POZ) domain containing 1 (Btbd1), mRNA.	1.8943	2.2974	1.2128
Tpmt		2.42559	2.94173	1.21279
rp9	Mus musculus retinitis pigmentosa 9 (human) (rp9), mRNA.	2.06098	2.49666	1.21139
Efha1	Mus musculus EF hand domain family A1 (Efha1), mRNA.	2.02792	2.45661	1.21139
Rtn3		1.88775	2.2868	1.21139
2610207P08Rik		1.83825	2.22427	1.20999
Pus3	Mus musculus pseudouridine synthase 3 (Pus3), mRNA.	1.96564	2.37293	1.2072
Zrsr2	Mus musculus zinc finger (CCCH type), RNA binding motif and serine/arginine rich 2 (Zrsr2), transcript variant 2, mRNA.	1.82134	2.19872	1.2072
Commd1	Mus musculus COMM domain containing 1 (Commd1), mRNA.	2.86129	3.45017	1.20581
Ncrna00117	Mus musculus non-protein coding RNA 117 (Ncrna00117), mRNA.	2.0586	2.47942	1.20442
Ino80c	Mus musculus INO80 complex subunit C (Ino80c), mRNA.	1.96564	2.36745	1.20442
Mocs2	Mus musculus molybdenum cofactor synthesis 2 (Mocs2), mRNA.	3.23403	3.89062	1.20303
Crls1	Mus musculus cardiolipin synthase 1 (Crls1), transcript variant 2, mRNA.	1.76541	2.12383	1.20302
Ebp	Mus musculus phenylalkylamine Ca2+ antagonist (emopamil) binding protein (Ebp), mRNA.	2.28416	2.7384	1.19887
Gkap1	Mus musculus G kinase anchoring protein 1 (Gkap1), mRNA.	2.09217	2.50822	1.19886
Wwtr1	Mus musculus WW domain containing transcription regulator 1 (Wwtr1), mRNA.	1.73508	2.07053	1.19333
Ffar3	Mus musculus free fatty acid receptor 3 (Ffar3), mRNA.	2.02558	2.41719	1.19333
Galnt1	Mus musculus UDP-N-acetyl-alpha-D-galactosamine:polypeptide N-acetylgalactosaminyltransferase 1 (Galnt1), mRNA.	1.74513	2.08012	1.19196
Chchd5	Mus musculus coiled-coil-helix-coiled-coil-helix domain containing 5 (Chchd5), mRNA.	1.81924	2.16845	1.19195
Ccdc50	Mus musculus coiled-coil domain containing 50 (Ccdc50), transcript variant 1, mRNA.	3.00008	3.57184	1.19058
Cutc	Mus musculus cutC copper transporter homolog (E.coli) (Cutc), mRNA.	2.12383	2.52567	1.18921
Btf3		2.11893	2.51984	1.1892
Cct8	Mus musculus chaperonin containing Tcp1, subunit 8 (theta) (Cct8), mRNA.	2.33755	2.77663	1.18784
Med7	Mus musculus mediator complex subunit 7 (Med7), mRNA.	2.8317	3.36359	1.18783
Tmem85	Mus musculus transmembrane protein 85 (Tmem85), mRNA.	2.92817	3.47417	1.18646
Zfp260	Mus musculus zinc finger protein 260 (Zfp260), mRNA.	2.00463	2.37841	1.18646
Rpl21	Mus musculus ribosomal protein L21 (Rpl21), mRNA.	3.27918	3.88164	1.18372
C130022K22Rik	Mus musculus RIKEN cDNA C130022K22 gene (C130022K22Rik), mRNA.	1.77769	2.10429	1.18372
8430410K20Rik	Mus musculus RIKEN cDNA 8430410K20 gene (8430410K20Rik), mRNA.	1.98848	2.3511	1.18236
Zscan21	Mus musculus zinc finger and SCAN domain containing 21 (Zscan21), transcript variant 4, mRNA.	1.82134	2.15348	1.18236
Ddx28	Mus musculus DEAD (Asp-Glu-Ala-Asp) box polypeptide 28 (Ddx28), nuclear gene encoding mitochondrial protein, mRNA.	2.07053	2.44528	1.18099
Gm114	Mus musculus gene model 114, (NCBI) (Gm114), mRNA. XM_925684 XM_925685	2.50244	2.95536	1.18099
Rab27a	Mus musculus RAB27A, member RAS oncogene family (Rab27a), mRNA.	1.82134	2.1386	1.17419
Rpl4	Mus musculus ribosomal protein L4 (Rpl4), mRNA.	1.90968	2.23974	1.17284
Gtpbp8	Mus musculus GTP-binding protein 8 (putative) (Gtpbp8), mRNA.	1.89212	2.21914	1.17283
Ppp2r5c	Mus musculus protein phosphatase 2, regulatory subunit B (B56), gamma isoform (Ppp2r5c), transcript variant 3, mRNA.	2.21402	2.57874	1.16473
E130118D18Rik		1.95206	2.27101	1.16339
Gstz1	Mus musculus glutathione transferase zeta 1 (maleylacetoacetate isomerase) (Gstz1), mRNA.	1.8943	2.20381	1.16339
Pnpla8	Mus musculus patatin-like phospholipase domain containing 8 (Pnpla8), mRNA.	1.74715	2.03261	1.16339
Appl1	Mus musculus adaptor protein, phosphotyrosine interaction, PH domain and leucine zipper containing 1 (Appl1), mRNA.	2.23974	2.60268	1.16205
Zfp768	Mus musculus zinc finger protein 768 (Zfp768), mRNA.	1.96791	2.2868	1.16205
Hax1	Mus musculus HCLS1 associated X-1 (Hax1), mRNA.	1.76337	2.04202	1.15802
Pldn	Mus musculus pallidin (Pldn), mRNA.	2.05148	2.37293	1.15669
Sec63	Mus musculus SEC63-like (S. cerevisiae) (Sec63), mRNA.	2.43401	2.81539	1.15669
Peci	Mus musculus peroxisomal delta3, delta2-enoyl-Coenzyme A isomerase (Peci), mRNA.	1.83825	2.12383	1.15535
Mcee	Mus musculus methylmalonyl CoA epimerase (Mcee), mRNA.	2.19112	2.53151	1.15535
Sdhaf2	succinate dehydrogenase complex assembly factor 2	2.83825	3.26406	1.15003
E430028B21Rik	Mus musculus RIKEN cDNA E430028B21 gene (E430028B21Rik), mRNA.	1.88557	2.15846	1.14473
Tmem111	Mus musculus transmembrane protein 111 (Tmem111), mRNA.	1.84463	2.10429	1.14077
Timm21	tranlocase of inner mitochondrial membrane 21	2.11893	2.41719	1.14076
Snap23	Mus musculus synaptosomal-associated protein 23 (Snap23), mRNA.	2.03496	2.31873	1.13945
Psma5	Mus musculus proteasome (prosome, macropain) subunit, alpha type 5 (Psma5), mRNA.	2.15099	2.45094	1.13945
Psmd12	Mus musculus proteasome (prosome, macropain) 26S subunit, non-ATPase, 12 (Psmd12), mRNA.	1.95432	2.22427	1.13813
M6pr	Mus musculus mannose-6-phosphate receptor, cation dependent (M6pr), mRNA.	1.88993	2.14851	1.13682
Polr3k	Mus musculus polymerase (RNA) III (DNA directed) polypeptide K (Polr3k), mRNA.	2.45945	2.79594	1.13682
Cept1	Mus musculus choline/ethanolaminephosphotransferase 1 (Cept1), mRNA.	1.82978	2.08012	1.13681
2700029M09Rik	RIKEN cDNA 2700029M09 gene	2.36199	2.68204	1.1355
Znhit6	Mus musculus zinc finger, HIT type 6 (Znhit6), mRNA.	2.20127	2.4909	1.13157
Aptx	Mus musculus aprataxin (Aptx), transcript variant 1, mRNA.	2.16845	2.45094	1.13027
D130027A21Rik		2.2217	2.50822	1.12896
Ttc1	Mus musculus tetratricopeptide repeat domain 1 (Ttc1), mRNA.	2.49666	2.81539	1.12766
Pet112l	Mus musculus PET112-like (yeast) (Pet112l), mRNA.	1.81924	2.05148	1.12766
Zmpste24	Mus musculus zinc metallopeptidase, STE24 homolog (S. cerevisiae) (Zmpste24), mRNA.	1.7818	2.00926	1.12766
1810013L24Rik	PREDICTED: Mus musculus RIKEN cDNA 1810013L24 gene (1810013L24Rik), mRNA.	1.77974	2.00463	1.12636
2400009B08Rik		2.49666	2.80889	1.12506
Drbp1		2.08734	2.34567	1.12376
Ccdc59	Mus musculus coiled-coil domain containing 59 (Ccdc59), mRNA.	2.25793	2.53737	1.12376
D9Ertd392e		1.79212	2.01391	1.12376
Eif2s2	Mus musculus eukaryotic translation initiation factor 2, subunit 2 (beta) (Eif2s2), mRNA.	2.00926	2.25532	1.12246
A530023B05Rik		1.83613	2.05148	1.11728
Tbc1d7	Mus musculus TBC1 domain family, member 7 (Tbc1d7), mRNA.	2.19872	2.45094	1.11471
Psma2	Mus musculus proteasome (prosome, macropain) subunit, alpha type 2 (Psma2), mRNA.	2.23457	2.4909	1.11471
Med8	Mus musculus mediator of RNA polymerase II transcription, subunit 8 homolog (yeast) (Med8), transcript variant 1, mRNA.	2.1386	2.37841	1.11213
Cdkn2aipnl	Mus musculus CDKN2A interacting protein N-terminal like (Cdkn2aipnl), mRNA.	2.38667	2.65124	1.11085
Med9	Mus musculus mediator of RNA polymerase II transcription, subunit 9 homolog (yeast) (Med9), mRNA.	2.41719	2.68204	1.10957
Cetn4	Mus musculus centrin 4 (Cetn4), mRNA.	2.35926	2.6087	1.10573
Pdzd11	Mus musculus PDZ domain containing 11 (Pdzd11), mRNA.	2.94854	3.25653	1.10446
Arl6	Mus musculus ADP-ribosylation factor-like 6 (Arl6), mRNA.	2.45094	2.70695	1.10445
Rfc4		1.87471	2.07053	1.10445
Dleu2		2.15099	2.37293	1.10318
Nudc	Mus musculus nuclear distribution gene C homolog (Aspergillus) (Nudc), mRNA.	2.39773	2.63902	1.10063
Umps	Mus musculus uridine monophosphate synthetase (Umps), mRNA.	2.08975	2.2974	1.09937
1190017O12Rik	Mus musculus RIKEN cDNA 1190017O12 gene (1190017O12Rik), mRNA.	2.15846	2.37293	1.09936
Mrps25		2.17347	2.38943	1.09936
Dtnbp1		2.20636	2.42279	1.09809
Rnmtl1	Mus musculus RNA methyltransferase like 1 (Rnmtl1), mRNA.	2.06814	2.27101	1.09809
Dnajc18	Mus musculus DnaJ (Hsp40) homolog, subfamily C, member 18 (Dnajc18), mRNA.	2.19112	2.4005	1.09556
Murc	muscle-related coiled-coil protein	2.10186	2.30271	1.09556
Nusap1	Mus musculus nucleolar and spindle associated protein 1 (Nusap1), transcript variant 2, mRNA.	1.90308	2.08493	1.09556
1700022C21Rik	Mus musculus RIKEN cDNA 1700022C21 gene (1700022C21Rik), mRNA.	1.90968	2.08975	1.09429
D10Jhu81e	Mus musculus DNA segment, Chr 10, Johns Hopkins University 81 expressed (D10Jhu81e), mRNA.	2.15348	2.35653	1.09429
Pigf	Mus musculus phosphatidylinositol glycan anchor biosynthesis, class F (Pigf), mRNA.	2.38943	2.6087	1.09177
Ppcs	Mus musculus phosphopantothenoylcysteine synthetase (Ppcs), mRNA.	1.89212	2.06575	1.09176
Mnat1	Mus musculus menage a trois 1 (Mnat1), mRNA.	2.51693	2.74473	1.09051
Mettl9	Mus musculus methyltransferase like 9 (Mettl9), mRNA.	2.01857	2.19872	1.08925
Rfxap	Mus musculus regulatory factor X-associated protein (Rfxap), mRNA.	2.08012	2.26054	1.08674
Skp1a	Mus musculus S-phase kinase-associated protein 1A (Skp1a), mRNA.	2.05623	2.23457	1.08673
Ccdc115	Mus musculus coiled-coil domain containing 115 (Ccdc115), mRNA.	2.28416	2.47942	1.08548
Ddit3	Mus musculus DNA-damage inducible transcript 3 (Ddit3), mRNA.	1.95206	2.11893	1.08548
Rbx1	Mus musculus ring-box 1 (Rbx1), mRNA.	2.05623	2.22942	1.08423
Spin2	Mus musculus spindlin family, member 2 (Spin2), mRNA.	2.03261	2.20381	1.08423
Ube2k	Mus musculus ubiquitin-conjugating enzyme E2K (UBC1 homolog, yeast) (Ube2k), mRNA.	1.92964	2.08975	1.08297
Fahd1	Mus musculus fumarylacetoacetate hydrolase domain containing 1 (Fahd1), nuclear gene encoding mitochondrial protein, mRNA.	3.38698	3.66378	1.08172
Fam115a	family with sequence similarity 115, member	2.08493	2.24492	1.07674
Sec61a1	Mus musculus Sec61 alpha 1 subunit (S. cerevisiae) (Sec61a1), mRNA.	2.00231	2.15348	1.0755
Dusp28	Mus musculus dual specificity phosphatase 28 (Dusp28), mRNA.	2.54324	2.73208	1.07425
1500031L02Rik	Mus musculus RIKEN cDNA 1500031L02 gene (1500031L02Rik), mRNA.	1.9141	2.05148	1.07177
Gpatch11	G patch domain containing 11	2.1386	2.29209	1.07177
Lrpap1	Mus musculus low density lipoprotein receptor-related protein associated protein 1 (Lrpap1), mRNA.	2.21658	2.37293	1.07054
D030056L22Rik	Mus musculus RIKEN cDNA D030056L22 gene (D030056L22Rik), mRNA.	1.90748	2.04202	1.07053
Gpx8	glutathione peroxidase 8 (putative)	2.37841	2.54324	1.0693
Gm14492	predicted gene 14492, miscRNA	2.23457	2.38943	1.0693
Dnajb12	Mus musculus DnaJ (Hsp40) homolog, subfamily B, member 12 (Dnajb12), mRNA.	2.18859	2.34026	1.0693
Pqbp1	Mus musculus polyglutamine binding protein 1 (Pqbp1), mRNA.	2.16595	2.31338	1.06807
Tdrkh	Mus musculus tudor and KH domain containing protein (Tdrkh), mRNA.	2.16595	2.31338	1.06807
Rilpl1	Mus musculus Rab interacting lysosomal protein-like 1 (Rilpl1), mRNA.	2.07292	2.20891	1.0656
Pole3	Mus musculus polymerase (DNA directed), epsilon 3 (p17 subunit) (Pole3), mRNA.	3.4066	3.63008	1.0656
5730427N09Rik	Mus musculus RIKEN cDNA 5730427N09 gene (5730427N09Rik), mRNA.	2.35926	2.51403	1.0656
Cops4	Mus musculus COP9 (constitutive photomorphogenic) homolog, subunit 4 (Arabidopsis thaliana) (Cops4), mRNA.	2.72263	2.90123	1.0656
1110029I05Rik	PREDICTED: Mus musculus RIKEN cDNA 1110029I05 gene (1110029I05Rik), mRNA.	1.93634	2.05623	1.06192
Thtpa	Mus musculus thiamine triphosphatase (Thtpa), mRNA.	2.20381	2.34026	1.06192
Zbtb33	Mus musculus zinc finger and BTB domain containing 33 (Zbtb33), transcript variant 2, mRNA.	1.90308	2.01857	1.06069
Ube2e3	Mus musculus ubiquitin-conjugating enzyme E2E 3, UBC4/5 homolog (yeast) (Ube2e3), mRNA.	2.0209	2.1386	1.05824
Casp7	Mus musculus caspase 7 (Casp7), mRNA.	2.04911	2.16845	1.05824
Bag1	Mus musculus Bcl2-associated athanogene 1 (Bag1), mRNA.	2.41999	2.55502	1.0558
Idh3b	Mus musculus isocitrate dehydrogenase 3 (NAD+) beta (Idh3b), nuclear gene encoding mitochondrial protein, mRNA.	1.90308	2.00926	1.05579
Rhoq	Mus musculus ras homolog gene family, member Q (Rhoq), mRNA.	2.19365	2.31338	1.05458
8430429K09Rik	RIKEN cDNA 8430429K09 gene, miscRNA	3.11666	3.27918	1.05215
Ppt1	Mus musculus palmitoyl-protein thioesterase 1 (Ppt1), mRNA.	2.20636	2.31873	1.05093
4930577N17Rik		2.06575	2.16845	1.04972
Smyd2	Mus musculus SET and MYND domain containing 2 (Smyd2), mRNA.	2.01391	2.10916	1.0473
Tox4	TOX high mobility group box family member 4	2.01391	2.10916	1.0473
Sept10	Mus musculus septin 10 (Sept10), transcript variant 1, mRNA.	2.03261	2.12874	1.04729
Mrps6	Mus musculus mitochondrial ribosomal protein S6 (Mrps6), nuclear gene encoding mitochondrial protein, mRNA.	2.19112	2.29209	1.04608
Atp6v1c1	Mus musculus \ATPase, H+ transporting, lysosomal V1 subunit C1 (Atp6v1c1), mRNA.	2.03731	2.12874	1.04488
Dpy30	Mus musculus dpy-30 homolog (C. elegans) (Dpy30), mRNA.	3.00355	3.13834	1.04488
Amz2	Mus musculus archaelysin family metallopeptidase 2 (Amz2), mRNA.	2.45094	2.56093	1.04488
Stoml2	Mus musculus stomatin (Epb7.2)-like 2 (Stoml2), mRNA.	2.10916	2.20381	1.04488
Plekha8	Mus musculus pleckstrin homology domain containing, family A (phosphoinositide binding specific) member 8 (Plekha8), mRNA.	2.74791	2.86791	1.04367
Zfp60	Mus musculus zinc finger protein 60 (Zfp60), transcript variant 2, mRNA.	2.0586	2.14355	1.04127
Deb1	Mus musculus differentially expressed in B16F10 1 (Deb1), mRNA.	2.31605	2.40605	1.03886
Ndufb8		2.51403	2.6087	1.03766
Nxn	Mus musculus nucleoredoxin (Nxn), mRNA.	2.11893	2.19872	1.03766
Hoxc9	Mus musculus homeo box C9 (Hoxc9), mRNA.	2.52567	2.61474	1.03527
Tpd52l2	Mus musculus tumor protein D52-like 2 (Tpd52l2), mRNA.	2.15846	2.23457	1.03526
Nrbf2	Mus musculus nuclear receptor binding factor 2 (Nrbf2), mRNA.	1.98848	2.05623	1.03407
Gtf2f2	Mus musculus general transcription factor IIF, polypeptide 2 (Gtf2f2), mRNA.	2.29209	2.36745	1.03288
Bxdc2	Mus musculus brix domain containing 2 (Bxdc2), mRNA.	2.6543	2.7384	1.03168
Mxra7	Mus musculus matrix-remodelling associated 7 (Mxra7), mRNA.	2.6666	2.75108	1.03168
1700013A01Rik		2.57279	2.64512	1.02811
2610001J05Rik	PREDICTED: Mus musculus RIKEN cDNA 2610001J05 gene (2610001J05Rik), misc RNA.	2.94854	3.03143	1.02811
Nudt2	Mus musculus nudix (nucleoside diphosphate linked moiety X)-type motif 2 (Nudt2), mRNA.	3.77114	3.87268	1.02693
Fam149b	Mus musculus family with sequence similarity 149, member B (Fam149b), transcript variant 1, mRNA.	2.22684	2.28153	1.02456
Itgb3bp	Mus musculus integrin beta 3 binding protein (beta3-endonexin) (Itgb3bp), mRNA.	2.34296	2.39496	1.02219
Rad51	Mus musculus RAD51 homolog (S. cerevisiae) (Rad51), mRNA.	2.20636	2.25532	1.02219
Sprr2a	Mus musculus small proline-rich protein 2A (Sprr2a), mRNA.	2.61474	2.66968	1.02101
Fez1	Mus musculus fasciculation and elongation protein zeta 1 (zygin I) (Fez1), mRNA.	2.01624	2.05623	1.01983
Vrk2	Mus musculus vaccinia related kinase 2 (Vrk2), mRNA.	2.03967	2.08012	1.01983
Psmf1		2.19112	2.23457	1.01983
Fgfr1op2	Mus musculus FGFR1 oncogene partner 2 (Fgfr1op2), mRNA.	2.07532	2.11404	1.01866
Rpl30	Mus musculus ribosomal protein L30 (Rpl30), mRNA.	2.89454	2.94854	1.01866
Zkscan14	Mus musculus zinc finger with KRAB and SCAN domains 14 (Zkscan14), mRNA.	2.14851	2.18354	1.0163
Gemin6	Mus musculus gem (nuclear organelle) associated protein 6 (Gemin6), mRNA.	2.61776	2.65737	1.01513
Hddc2	Mus musculus HD domain containing 2 (Hddc2), mRNA.	2.99661	3.03845	1.01396
Ccdc12	Mus musculus coiled-coil domain containing 12 (Ccdc12), mRNA.	2.42559	2.45661	1.01279
Cmc1	Mus musculus COX assembly mitochondrial protein homolog (S. cerevisiae) (Cmc1), nuclear gene encoding mitochondrial protein, mRNA.	2.61776	2.64512	1.01045
Mrpl40	Mus musculus mitochondrial ribosomal protein L40 (Mrpl40), nuclear gene encoding mitochondrial protein, mRNA.	2.57576	2.60268	1.01045
Mobkl1a	Mus musculus MOB1, Mps One Binder kinase activator-like 1A (yeast) (Mobkl1a), mRNA.	2.11404	2.13366	1.00928
Tatdn1	TatD DNase domain containing 1	2.32678	2.34567	1.00812
Gcat		2.14602	2.15846	1.0058
Ndufa10	Mus musculus NADH dehydrogenase (ubiquinone) 1 alpha subcomplex 10 (Ndufa10), nuclear gene encoding mitochondrial protein, mRNA.	2.16595	2.17347	1.00347
Tamm41	TAM41, mitochondrial translocator assembly and maintenance protein, homolog (S. cerevisiae)	2.62989	2.63902	1.00347
Ppp2r2d	Mus musculus protein phosphatase 2, regulatory subunit B, delta isoform (Ppp2r2d), mRNA.	2.03261	2.03731	1.00231
2010320M18Rik		2.28153	2.2868	1.00231
Ccdc58	Mus musculus coiled-coil domain containing 58 (Ccdc58), mRNA.	2.88786	2.88786	1
Cenpw	centromere protein W	2.22427	2.22427	1
Fam149b	family with sequence similarity 149, member B	2.09217	2.08493	0.996539
Gatad1	Mus musculus GATA zinc finger domain containing 1 (Gatad1), mRNA.	2.20127	2.19365	0.996538
1110012L19Rik	Mus musculus RIKEN cDNA 1110012L19 gene (1110012L19Rik), mRNA.	3.35582	3.34035	0.99539
Rnaset2	Mus musculus ribonuclease T2 (Rnaset2), transcript variant 2, mRNA.	2.05623	2.04675	0.99539
Psmb6	Mus musculus proteasome (prosome, macropain) subunit, beta type 6 (Psmb6), mRNA.	2.25532	2.24492	0.995389
Ccdc127	Mus musculus coiled-coil domain containing 127 (Ccdc127), mRNA.	2.47084	2.45094	0.991946
Ccdc53	Mus musculus coiled-coil domain containing 53 (Ccdc53), mRNA.	3.49026	3.45815	0.9908
4930453N24Rik	Mus musculus RIKEN cDNA 4930453N24 gene (4930453N24Rik), mRNA.	3.33264	3.30198	0.9908
Mrpl44	Mus musculus mitochondrial ribosomal protein L44 (Mrpl44), nuclear gene encoding mitochondrial protein, mRNA.	2.0586	2.03731	0.989658
Suclg2	Mus musculus succinate-Coenzyme A ligase, GDP-forming, beta subunit (Suclg2), mRNA.	2.02558	2.00463	0.989657
Tspan6	Mus musculus tetraspanin 6 (Tspan6), mRNA.	2.02558	2.00463	0.989657
Timm17a	Mus musculus translocase of inner mitochondrial membrane 17a (Timm17a), nuclear gene encoding mitochondrial protein, mRNA.	2.23457	2.20891	0.988517
Rps24	Mus musculus ribosomal protein S24 (Rps24), transcript variant 2, mRNA.	3.49833	3.45815	0.988515
Uchl3	Mus musculus ubiquitin carboxyl-terminal esterase L3 (ubiquitin thiolesterase) (Uchl3), mRNA.	2.79917	2.76383	0.987375
Auh		4.2624	4.19887	0.985095
Eef1e1	Mus musculus eukaryotic translation elongation factor 1 epsilon 1 (Eef1e1), mRNA.	2.32947	2.29209	0.983953
Arl3	Mus musculus ADP-ribosylation factor-like 3 (Arl3), mRNA.	2.40883	2.36745	0.982822
Dnajc15	Mus musculus DnaJ (Hsp40) homolog, subfamily C, member 15 (Dnajc15), mRNA.	3.47818	3.41843	0.982821
2810417H13Rik	Mus musculus RIKEN cDNA 2810417H13 gene (2810417H13Rik), mRNA.	2.14355	2.08975	0.974901
Muted	Mus musculus muted (Muted), mRNA.	2.72263	2.65124	0.973779
Mns1	Mus musculus meiosis-specific nuclear structural protein 1 (Mns1), mRNA.	2.21914	2.15846	0.972656
Mrpl48	Mus musculus mitochondrial ribosomal protein L48 (Mrpl48), nuclear gene encoding mitochondrial protein, mRNA.	3.12748	3.03845	0.971533
Nes	Mus musculus nestin (Nes), mRNA.	2.59368	2.51984	0.971531
Apitd1	Mus musculus apoptosis-inducing, TAF9-like domain 1 (Apitd1), mRNA.	2.12383	2.06098	0.970407
Nkap	NFKB activating protein	2.30537	2.22942	0.967055
1810009A15Rik	RIKEN cDNA 1810009A15 gene	2.88452	2.78949	0.967055
Lyrm2	Mus musculus LYR motif containing 2 (Lyrm2), mRNA.	2.42279	2.34026	0.965936
Rrp15	Mus musculus ribosomal RNA processing 15 homolog (S. cerevisiae) (Rrp15), mRNA.	2.20636	2.12874	0.96482
Il1rl1l		2.13613	2.06098	0.96482
Ddrgk1	Mus musculus DDRGK domain containing 1 (Ddrgk1), mRNA. XM_925578 XM_925581 XM_925583 XM_994018 XM_994040 XM_994059 XM_994077	2.1312	2.05148	0.962594
Smim20	small integral membrane protein 20	2.26577	2.1785	0.961483
Hras1		2.77984	2.66968	0.960372
Crcp	Mus musculus calcitonin gene-related peptide-receptor component protein (Crcp), mRNA.	2.62989	2.52567	0.960371
Robld3	Mus musculus roadblock domain containing 3 (Robld3), mRNA.	2.23716	2.14355	0.958157
Msi2	Mus musculus Musashi homolog 2 (Drosophila) (Msi2), mRNA.	2.01624	1.93187	0.958155
Yeats4	Mus musculus YEATS domain containing 4 (Yeats4), mRNA.	2.06575	1.97703	0.957052
Nrn1	Mus musculus neuritin 1 (Nrn1), mRNA.	2.01159	1.92297	0.955945
Cacna2d1		2.34026	2.23457	0.954838
D10Ertd322e	Mus musculus DNA segment, Chr 10, ERATO Doi 322, expressed (D10Ertd322e), mRNA.	2.91467	2.77663	0.95264
Nola2	Mus musculus nucleolar protein family A, member 2 (Nola2), mRNA.	2.02324	1.92741	0.952635
Nt5c3	Mus musculus 5'-nucleotidase, cytosolic III (Nt5c3), mRNA.	2.33486	2.21914	0.950438
Atg10	Mus musculus autophagy-related 10 (yeast) (Atg10), mRNA.	2.14851	2.04202	0.950435
Prkra	Mus musculus protein kinase, interferon inducible double stranded RNA dependent activator (Prkra), mRNA.	2.0209	1.91853	0.949344
3830406C13Rik	Mus musculus RIKEN cDNA 3830406C13 gene (3830406C13Rik), transcript variant 2, mRNA.	2.58172	2.44528	0.947152
Tomm6	Mus musculus translocase of outer mitochondrial membrane 6 homolog (yeast) (Tomm6), nuclear gene encoding mitochondrial protein, mRNA.	2.21146	2.08975	0.944964
Acbd6	Mus musculus acyl-Coenzyme A binding domain containing 6 (Acbd6), mRNA.	2.67895	2.53151	0.944964
Serp2	stress-associated endoplasmic reticulum protein family member 2	2.16845	2.04675	0.943877
Rpo2tc1		2.48515	2.34567	0.943875
Aatf	Mus musculus apoptosis antagonizing transcription factor (Aatf), mRNA.	2.09217	1.97247	0.942787
Chrac1	Mus musculus chromatin accessibility complex 1 (Chrac1), mRNA.	2.04202	1.92297	0.9417
Prdx2	Mus musculus peroxiredoxin 2 (Prdx2), mRNA.	2.1785	2.05148	0.941694
Denr	Mus musculus density-regulated protein (Denr), mRNA.	2.26315	2.12874	0.940609
BC013529	Mus musculus cDNA sequence BC013529 (BC013529), mRNA.	2.72578	2.56093	0.939522
Bfar	Mus musculus bifunctional apoptosis regulator (Bfar), mRNA.	2.18102	2.04675	0.938437
Vps51	vacuolar protein sorting 51 homolog (S. cerevisiae)	2.32678	2.17347	0.934111
Ak3	Mus musculus adenylate kinase 3 (Ak3), nuclear gene encoding mitochondrial protein, mRNA.	2.16345	2.01857	0.933033
Ndufaf1	Mus musculus NADH dehydrogenase (ubiquinone) 1 alpha subcomplex, assembly factor 1 (Ndufaf1), mRNA.	2.73524	2.54912	0.931955
Sumo1		2.3511	2.18354	0.928731
Rpl19	Mus musculus ribosomal protein L19 (Rpl19), mRNA.	2.18859	2.03261	0.92873
Rpl28		2.45945	2.28153	0.927659
Tsen15	Mus musculus tRNA splicing endonuclease 15 homolog (S. cerevisiae) (Tsen15), mRNA.	3.33264	3.08799	0.92659
R3hcc1	PREDICTED: Mus musculus R3H domain and coiled-coil containing 1 (R3hcc1), mRNA.	2.23974	2.07532	0.92659
Gid8	GID complex subunit 8 homolog (S. cerevisiae)	2.10672	1.94981	0.925519
Decr1	Mus musculus 2,4-dienoyl CoA reductase 1, mitochondrial (Decr1), nuclear gene encoding mitochondrial protein, mRNA.	2.03731	1.88339	0.924449
Rpl7a	Mus musculus ribosomal protein L7a (Rpl7a), mRNA.	3.57597	3.29436	0.921249
Hoxb7	Mus musculus homeo box B7 (Hoxb7), mRNA.	2.04675	1.88339	0.920186
BC023829		2.43682	2.23974	0.919124
Erp29	Mus musculus endoplasmic reticulum protein 29 (Erp29), mRNA.	2.09701	1.92741	0.919123
Oaz2	Mus musculus ornithine decarboxylase antizyme 2 (Oaz2), mRNA.	2.12383	1.94981	0.918063
D4Ertd22e	Mus musculus DNA segment, Chr 4, ERATO Doi 22, expressed (D4Ertd22e), transcript variant 2, mRNA.	3.18215	2.92141	0.918062
Lrrc59	Mus musculus leucine rich repeat containing 59 (Lrrc59), mRNA.	2.08734	1.9141	0.917004
Rpl31	Mus musculus ribosomal protein L31 (Rpl31), mRNA.	2.11893	1.94082	0.915943
Mrps33	Mus musculus mitochondrial ribosomal protein S33 (Mrps33), nuclear gene encoding mitochondrial protein, transcript variant 1, mRNA.	2.56093	2.34026	0.913832
Gtf2f1	Mus musculus general transcription factor IIF, polypeptide 1 (Gtf2f1), mRNA.	2.28416	2.08012	0.910672
Bccip	Mus musculus BRCA2 and CDKN1A interacting protein (Bccip), mRNA.	2.25272	2.05148	0.910668
4930563E22Rik	PREDICTED: Mus musculus RIKEN cDNA 4930563E22 gene, transcript variant 3 (4930563E22Rik), mRNA.	2.29474	2.08493	0.908569
Parl	Mus musculus presenilin associated, rhomboid-like (Parl), mRNA.	2.04675	1.85746	0.907517
Xpa	Mus musculus xeroderma pigmentosum, complementation group A (Xpa), mRNA.	2.71948	2.46229	0.905427
Mrpl15		3.29436	2.9828	0.905426
Cltb	Mus musculus clathrin, light polypeptide (Lcb) (Cltb), mRNA.	2.0209	1.82766	0.904379
2210015D19Rik	PREDICTED: Mus musculus RIKEN cDNA 2210015D19 gene,miscRNA	2.74791	2.48515	0.904378
Psmc3ip	Mus musculus proteasome (prosome, macropain) 26S subunit, ATPase 3, interacting protein (Psmc3ip), mRNA.	3.75809	3.39482	0.903337
Swsap1	SWIM type zinc finger 7 associated protein 1	2.22942	2.01391	0.903334
Sgta	Mus musculus small glutamine-rich tetratricopeptide repeat (TPR)-containing, alpha (Sgta), mRNA.	2.00694	1.81085	0.902294
Mterfd2	Mus musculus MTERF domain containing 2 (Mterfd2), mRNA.	2.20636	1.99078	0.902292
Oraov1	Mus musculus oral cancer overexpressed 1 (Oraov1), mRNA.	2.08975	1.87905	0.899175
Rpl24	Mus musculus ribosomal protein L24 (Rpl24), mRNA.	2.58471	2.31873	0.897095
Scnm1		3.00702	2.69447	0.89606
Pomp	Mus musculus proteasome maturation protein (Pomp), mRNA.	2.51693	2.25532	0.89606
Nqo1	Mus musculus NAD(P)H dehydrogenase, quinone 1 (Nqo1), mRNA.	3.04196	2.71948	0.893989
Rwdd1	Mus musculus RWD domain containing 1 (Rwdd1), mRNA.	3.81055	3.40267	0.89296
Acadl	Mus musculus acyl-Coenzyme A dehydrogenase, long-chain (Acadl), mRNA.	2.7384	2.43964	0.8909
Hdac8	Mus musculus histone deacetylase 8 (Hdac8), mRNA.	2.25793	2.00463	0.887818
Enpp5	Mus musculus ectonucleotide pyrophosphatase/phosphodiesterase 5 (Enpp5), mRNA.	2.01391	1.78592	0.886792
Spata24	spermatogenesis associated 24	3.84593	3.40267	0.884746
Lsm5	Mus musculus LSM5 homolog, U6 small nuclear RNA associated (S. cerevisiae) (Lsm5), mRNA.	2.10916	1.86176	0.882702
Zfp691	Mus musculus zinc finger protein 691 (Zfp691), mRNA.	2.24233	1.97703	0.881686
Pts	Mus musculus 6-pyruvoyl-tetrahydropterin synthase (Pts), mRNA.	2.87454	2.53151	0.880666
Cd59a	Mus musculus CD59a antigen (Cd59a), mRNA.	2.96905	2.60268	0.876604
D530030K12Rik		2.08734	1.82766	0.875593
Arl16	Mus musculus ADP-ribosylation factor-like 16 (Arl16), mRNA.	2.12138	1.85746	0.87559
Tmem234	transmembrane protein 234	2.18102	1.90968	0.87559
Rbm45	Mus musculus RNA binding motif protein 45 (Rbm45), mRNA.	2.19112	1.9141	0.873572
Sra1	Mus musculus steroid receptor RNA activator 1 (Sra1), mRNA.	2.30804	2.01391	0.872563
Smim4	small itegral membrane protein 4, miscRNA	2.38392	2.08012	0.872563
Mkks	Mus musculus McKusick-Kaufman syndrome protein (Mkks), mRNA.	2.2217	1.93634	0.871558
Commd10	Mus musculus COMM domain containing 10 (Commd10), mRNA.	2.4312	2.11893	0.871557
Cd3eap	Mus musculus CD3E antigen, epsilon polypeptide associated protein (Cd3eap), mRNA.	2.4005	2.08975	0.870548
Ppil3	Mus musculus peptidylprolyl isomerase (cyclophilin)-like 3 (Ppil3), transcript variant 1, mRNA.	3.25277	2.82843	0.869545
2700060E02Rik	RIKEN cDNA 2700060E02 gene	3.47818	3.01746	0.86754
Psmc5	Mus musculus protease (prosome, macropain) 26S subunit, ATPase 5 (Psmc5), mRNA.	2.10672	1.82344	0.865535
Park7	Mus musculus Parkinson disease (autosomal recessive, early onset) 7 (Park7), mRNA.	2.12874	1.84038	0.86454
B3galtl	Mus musculus beta 1,3-galactosyltransferase-like (B3galtl), mRNA.	2.17096	1.87471	0.86354
Cyp4v3	Mus musculus cytochrome P450, family 4, subfamily v, polypeptide 3 (Cyp4v3), mRNA.	2.39773	2.07053	0.863538
Mrpl47	Mus musculus mitochondrial ribosomal protein L47 (Mrpl47), nuclear gene encoding mitochondrial protein, mRNA.	3.05958	2.63902	0.862543
Mettl1	Mus musculus methyltransferase-like 1 (Mettl1), mRNA.	2.37841	2.05148	0.862543
Mrpl46	Mus musculus mitochondrial ribosomal protein L46 (Mrpl46), nuclear gene encoding mitochondrial protein, mRNA.	3.40267	2.93494	0.86254
Pparg	Mus musculus peroxisome proliferator activated receptor gamma (Pparg), mRNA.	2.11648	1.81924	0.859559
Pfn2	Mus musculus profilin 2 (Pfn2), mRNA.	2.13613	1.83613	0.859559
Nsep1		2.15099	1.8489	0.859558
BC046404	Mus musculus cDNA sequence BC046404 (BC046404), mRNA.	2.13613	1.83189	0.857574
Isy1	Mus musculus ISY1 splicing factor homolog (S. cerevisiae) (Isy1), mRNA.	2.23974	1.9141	0.854608
Atp6v1g1	Mus musculus ATPase, H+ transporting, lysosomal V1 subunit G1 (Atp6v1g1), mRNA.	3.02444	2.58471	0.854608
Dhdh	Mus musculus dihydrodiol dehydrogenase (dimeric) (Dhdh), mRNA.	2.72263	2.32409	0.853619
Psmb7	Mus musculus proteasome (prosome, macropain) subunit, beta type 7 (Psmb7), mRNA.	2.16345	1.84463	0.852634
Timm9	Mus musculus translocase of inner mitochondrial membrane 9 homolog (yeast) (Timm9), nuclear gene encoding mitochondrial protein, transcript variant 1, mRNA.	2.11893	1.80667	0.852633
Ccdc62	PREDICTED: Mus musculus coiled-coil domain containing 62 (Ccdc62), mRNA.	2.02324	1.71713	0.848703
Tdrd3	Mus musculus tudor domain containing 3 (Tdrd3), mRNA.	2.00231	1.69741	0.847726
Ccm2	Mus musculus cerebral cavernous malformation 2 homolog (human) (Ccm2), mRNA.	2.06575	1.74917	0.846748
Snrnp25	small nuclear ribonucleoprotein 25 (U11/U12)	2.54912	2.15846	0.846747
Gstm1	Mus musculus glutathione S-transferase, mu 1 (Gstm1), mRNA.	2.04438	1.72907	0.845767
Hoxa7	Mus musculus homeo box A7 (Hoxa7), mRNA.	2.34838	1.98618	0.845766
Nkd1	Mus musculus naked cuticle 1 homolog (Drosophila) (Nkd1), mRNA.	2.03731	1.7211	0.84479
Dph3	Mus musculus DPH3 homolog (KTI11, S. cerevisiae) (Dph3), transcript variant 1, mRNA.	2.58471	2.1785	0.842841
Nicn1	Mus musculus nicolin 1 (Nicn1), mRNA.	2.02792	1.70921	0.842839
Tyms-ps	Mus musculus thymidylate synthase, pseudogene (Tyms-ps), non-coding RNA.	2.56685	2.15846	0.840898
Rpl27a	Mus musculus ribosomal protein L27a (Rpl27a), mRNA.	2.51403	2.11404	0.840897
Bola1	Mus musculus bolA-like 1 (E. coli) (Bola1), mRNA.	2.4909	2.09459	0.840897
Gins1	PREDICTED: Mus musculus GINS complex subunit 1 (Psf1 homolog), transcript variant 4 (Gins1), mRNA.	2.4005	2.01391	0.838954
Hdgf	Mus musculus hepatoma-derived growth factor (Hdgf), mRNA.	2.50533	2.09943	0.837985
Bat4	Mus musculus HLA-B associated transcript 4 (Bat4), mRNA.	2.06098	1.72508	0.837019
Cbx3		2.68825	2.24492	0.835086
Dnajc28	Mus musculus DnaJ (Hsp40) homolog, subfamily C, member 28 (Dnajc28), transcript variant 2, mRNA.	2.28416	1.90528	0.834127
Wbp1	Mus musculus WW domain binding protein 1 (Wbp1), transcript variant 1, mRNA.	2.56982	2.14355	0.834125
Sephs2	Mus musculus selenophosphate synthetase 2 (Sephs2), mRNA.	2.08252	1.73708	0.834124
Rpl23	Mus musculus ribosomal protein L23 (Rpl23), mRNA.	2.82516	2.35653	0.834123
Rab1	Mus musculus RAB1, member RAS oncogene family (Rab1), mRNA.	2.23974	1.86607	0.833164
Apip	Mus musculus APAF1 interacting protein (Apip), mRNA.	2.53151	2.10916	0.833163
Fam162a	Mus musculus family with sequence similarity 162, member A (Fam162a), mRNA.	2.49666	2.08012	0.833161
Rbm43	Mus musculus RNA binding motif protein 43 (Rbm43), mRNA.	2.28416	1.90088	0.832201
9530068E07Rik	Mus musculus RIKEN cDNA 9530068E07 gene (9530068E07Rik), mRNA.	2.34296	1.94531	0.830279
Ggct	gamma-glutamyl cyclotransferase	2.69758	2.23974	0.830278
Creg1	Mus musculus cellular repressor of E1A-stimulated genes 1 (Creg1), mRNA.	2.46229	2.03731	0.827405
Tfpt	Mus musculus TCF3 (E2A) fusion partner (Tfpt), mRNA.	2.72263	2.25012	0.826451
Rpl26	Mus musculus ribosomal protein L26 (Rpl26), mRNA.	2.02792	1.67404	0.825496
Lip1		2.31338	1.90088	0.821689
Snrnp35	small nuclear ribonucleoprotein 35 (U11/U12)	3.16382	2.59668	0.820742
Cno	Mus musculus cappuccino (Cno), mRNA.	2.8317	2.32409	0.82074
Ppp1r11	Mus musculus protein phosphatase 1, regulatory (inhibitor) subunit 11 (Ppp1r11), mRNA.	4.90187	4.01853	0.819795
Coprs	coordinator of PRMT5, differentiation stimulato	2.68825	2.20381	0.819794
Dnajc17	Mus musculus DnaJ (Hsp40) homolog, subfamily C, member 17 (Dnajc17), mRNA.	2.48228	2.03261	0.818848
Ralb	Mus musculus v-ral simian leukemia viral oncogene homolog B (ras related) (Ralb), mRNA.	2.66968	2.18354	0.817903
Mpv17	Mus musculus Mpv17 transgene, kidney disease mutant (Mpv17), mRNA.	2.46798	2.00926	0.814131
Rnf114	Mus musculus ring finger protein 114 (Rnf114), mRNA.	2.05623	1.67404	0.814131
Dnajc19	Mus musculus DnaJ (Hsp40) homolog, subfamily C, member 19 (Dnajc19), transcript variant 2, mRNA.	2.69758	2.19365	0.813192
Chchd8	Mus musculus coiled-coil-helix-coiled-coil-helix domain containing 8 (Chchd8), mRNA.	2.88786	2.34567	0.812252
Clic1		2.14355	1.73708	0.810375
Eif4b		2.33755	1.89212	0.809446
Mrpl50	Mus musculus mitochondrial ribosomal protein L50 (Mrpl50), nuclear gene encoding mitochondrial protein, mRNA.	2.30537	1.86607	0.809445
Fkbp2	Mus musculus FK506 binding protein 2 (Fkbp2), mRNA.	2.8912	2.34026	0.809442
Rhoc	Mus musculus ras homolog gene family, member C (Rhoc), mRNA.	2.18859	1.76949	0.808507
Synj2bp	Mus musculus synaptojanin 2 binding protein (Synj2bp), mRNA.	2.29209	1.8489	0.806644
Ly6c1	Mus musculus lymphocyte antigen 6 complex, locus C1 (Ly6c1), mRNA.	2.01857	1.60956	0.797376
Rpl12	Mus musculus ribosomal protein L12 (Rpl12), mRNA.	2.26577	1.80667	0.797376
BC064033		2.59068	2.06098	0.795536
Smpdl3a	Mus musculus sphingomyelin phosphodiesterase, acid-like 3A (Smpdl3a), mRNA.	2.31873	1.84463	0.795535
Cgrrf1	Mus musculus cell growth regulator with ring finger domain 1 (Cgrrf1), mRNA.	2.1386	1.70133	0.795534
D2Ertd750e	Mus musculus DNA segment, Chr 2, ERATO Doi 750, expressed (D2Ertd750e), mRNA.	2.09943	1.66632	0.793701
BC028528	Mus musculus cDNA sequence BC028528 (BC028528), mRNA.	2.44811	1.94082	0.792783
Mapbpip-pending		3.27918	2.59668	0.791869
Pgam1	Mus musculus phosphoglycerate mutase 1 (Pgam1), mRNA.	2.20636	1.74513	0.790954
Trappc6a	Mus musculus trafficking protein particle complex 6A (Trappc6a), mRNA.	2.33216	1.84038	0.789131
Med4	Mus musculus mediator of RNA polymerase II transcription, subunit 4 homolog (yeast) (Med4), mRNA.	2.55502	2.00463	0.784585
Alg2	Mus musculus asparagine-linked glycosylation 2 homolog (yeast, alpha-1,3-mannosyltransferase) (Alg2), mRNA.	3.15287	2.46229	0.780968
Mras	Mus musculus muscle and microspikes RAS (Mras), mRNA.	2.35653	1.82344	0.773782
Hsbp1	Mus musculus heat shock factor binding protein 1 (Hsbp1), mRNA.	2.57874	1.99538	0.773781
Prkrip1	Mus musculus Prkr interacting protein 1 (IL11 inducible) (Prkrip1), mRNA.	2.84481	2.19872	0.772888
D11Wsu99e	Mus musculus DNA segment, Chr 11, Wayne State University 99, expressed (D11Wsu99e), mRNA.	2.40883	1.85746	0.771105
Orc3l	Mus musculus origin recognition complex, subunit 3-like (S. cerevisiae) (Orc3l), mRNA.	2.13613	1.64338	0.769326
Dph4	Mus musculus DPH4 homolog (JJJ3, S. cerevisiae) (Dph4), mRNA.	2.56685	1.97247	0.76844
Ranbp1	Mus musculus RAN binding protein 1 (Ranbp1), mRNA.	2.1116	1.62076	0.767551
Cgrrf1	cell growth regulator with ring finger domain 1	2.06575	1.58374	0.766666
Tfb2m	Mus musculus transcription factor B2, mitochondrial (Tfb2m), mRNA.	2.57279	1.97247	0.766666
Cox7a2l	Mus musculus cytochrome c oxidase subunit VIIa polypeptide 2-like (Cox7a2l), mRNA.	2.73524	2.09459	0.765779
Nat15	Mus musculus N-acetyltransferase 15 (GCN5-related, putative) (Nat15), mRNA.	2.21146	1.68958	0.764011
Commd3	Mus musculus COMM domain containing 3 (Commd3), mRNA.	2.20127	1.68179	0.764009
Pdk2	Mus musculus pyruvate dehydrogenase kinase, isoenzyme 2 (Pdk2), mRNA.	2.11893	1.61702	0.76313
Ran	Mus musculus RAN, member RAS oncogene family (Ran), mRNA.	2.25532	1.7211	0.763129
Aamdc	adipogenesis associated Mth938 domain containing	3.08799	2.3511	0.761369
Dctpp1	Mus musculus RIKEN cDNA 2410015N17 gene (2410015N17Rik), mRNA.	3.35582	2.54912	0.759612
Ecsit	Mus musculus ECSIT homolog (Drosophila) (Ecsit), mRNA.	2.61474	1.9816	0.757857
2810025M15Rik	RIKEN cDNA 2810025M15 gene, misc RNA.	2.59968	1.96791	0.756982
Hsd17b10	Mus musculus hydroxysteroid (17-beta) dehydrogenase 10 (Hsd17b10), nuclear gene encoding mitochondrial protein, mRNA.	2.14355	1.61702	0.754365
Layn	PREDICTED: Mus musculus layilin (Layn), mRNA.	2.15348	1.62076	0.752624
Hexim2	Mus musculus hexamthylene bis-acetamide inducible 2 (Hexim2), mRNA.	2.85799	2.14851	0.751756
Bod1	biorientation of chromosomes in cell division 1	2.0586	1.54756	0.751754
Mrpl18	Mus musculus mitochondrial ribosomal protein L18 (Mrpl18), nuclear gene encoding mitochondrial protein, mRNA.	2.8912	2.17347	0.751754
Brp44	Mus musculus brain protein 44 (Brp44), mRNA.	2.03026	1.52274	0.750022
Rpp38		2.38943	1.7818	0.745701
P4ha1	Mus musculus procollagen-proline, 2-oxoglutarate 4-dioxygenase (proline 4-hydroxylase), alpha 1 polypeptide (P4ha1), mRNA.	2.39496	1.78592	0.745699
Zmat5	Mus musculus zinc finger, matrin type 5 (Zmat5), mRNA.	2.20891	1.64338	0.743978
Blvra		2.01624	1.49831	0.743121
Serpinb6a	Mus musculus serine (or cysteine) peptidase inhibitor, clade B, member 6a (Serpinb6a), mRNA.	2.12874	1.58008	0.742261
Slc6a6		2.4005	1.77769	0.74055
Me2	Mus musculus malic enzyme 2, NAD(+)-dependent, mitochondrial (Me2), nuclear gene encoding mitochondrial protein, mRNA.	2.13613	1.58008	0.739693
Nxt1	Mus musculus NTF2-related export protein 1 (Nxt1), mRNA.	2.32409	1.71713	0.73884
Hrsp12	Mus musculus heat-responsive protein 12 (Hrsp12), mRNA.	2.91804	2.15348	0.737989
Them2	Mus musculus thioesterase superfamily member 2 (Them2), mRNA.	3.01397	2.22427	0.737987
Cdkn3	PREDICTED: Mus musculus cyclin-dependent kinase inhibitor 3, transcript variant 5 (Cdkn3), mRNA.	2.22942	1.64338	0.737133
Nudc-ps1	Mus musculus nuclear distribution gene C homolog (Aspergillus), pseudogene 1 (Nudc-ps1), non-coding RNA.	2.09943	1.54756	0.737133
Ict1	Mus musculus immature colon carcinoma transcript 1 (Ict1), mRNA.	2.28153	1.68179	0.737133
Cfl2	Mus musculus cofilin 2, muscle (Cfl2), mRNA.	2.54912	1.87471	0.735434
Acp1		3.18951	2.34567	0.735433
2810004N23Rik	RIKEN cDNA 2810004N23 gene	2.78627	2.04675	0.734584
Fkbpl	Mus musculus FK506 binding protein-like (Fkbpl), mRNA.	2.20381	1.61702	0.733738
Atg12	Mus musculus autophagy-related 12 (yeast) (Atg12), mRNA.	2.19872	1.61328	0.733736
Nutf2	Mus musculus nuclear transport factor 2 (Nutf2), mRNA.	2.61172	1.9141	0.732889
N6amt1	Mus musculus N-6 adenine-specific DNA methyltransferase 1 (putative) (N6amt1), mRNA.	2.16595	1.5874	0.732889
Car5b	carbonic anhydrase 5b, mitochondrial	2.03967	1.49485	0.732888
D17Wsu104e		2.33486	1.70527	0.730352
Tulip1-pending		2.04202	1.48796	0.728671
Lonp2	Mus musculus lon peptidase 2, peroxisomal (Lonp2), mRNA. XM_001000568	2.04438	1.48796	0.727829
Psmc1		2.10429	1.52979	0.726986
Glrx2	Mus musculus glutaredoxin 2 (thioltransferase) (Glrx2), transcript variant 1, mRNA.	2.8646	2.08012	0.726147
Sord	Mus musculus sorbitol dehydrogenase (Sord), mRNA.	2.15846	1.56555	0.725309
Usf1	Mus musculus upstream transcription factor 1 (Usf1), mRNA.	2.12874	1.54399	0.725307
Tmem87a	transmembrane protein 87A	2.04202	1.47768	0.723636
Copz2	Mus musculus coatomer protein complex, subunit zeta 2 (Copz2), mRNA.	2.08734	1.50177	0.719466
Gabra3	Mus musculus gamma-aminobutyric acid (GABA-A) receptor, subunit alpha 3 (Gabra3), mRNA.	2.01159	1.44727	0.719466
Tprkb	Mus musculus Tp53rk binding protein (Tprkb), mRNA.	2.19619	1.57644	0.717807
Ap1g2	Mus musculus adaptor protein complex AP-1, gamma 2 subunit (Ap1g2), mRNA.	2.90123	2.08012	0.716979
Fkbp1b		2.94854	2.09943	0.712024
Ogfod3	2-oxoglutarate and iron-dependent oxygenase domain containing 3	2.04438	1.45397	0.711203
Thoc4	Mus musculus THO complex 4 (Thoc4), mRNA.	2.2974	1.62826	0.70874
Ppp2r5d	Mus musculus protein phosphatase 2, regulatory subunit B (B56), delta isoform (Ppp2r5d), mRNA.	2.5403	1.79834	0.707924
Spcs3	Mus musculus signal peptidase complex subunit 3 homolog (S. cerevisiae) (Spcs3), mRNA.	2.57279	1.81924	0.707108
Gbp1	Mus musculus guanylate binding protein 1 (Gbp1), mRNA.	2.21402	1.56555	0.707107
Tmem218	Mus musculus transmembrane protein 218 (Tmem218), mRNA.	2.1785	1.54043	0.707106
Lrtm1	Mus musculus leucine-rich repeats and transmembrane domains 1 (Lrtm1), mRNA.	2.10429	1.48452	0.705473
Rnf121	Mus musculus ring finger protein 121 (Rnf121), mRNA.	2.38116	1.67791	0.704661
Acp2	Mus musculus acid phosphatase 2, lysosomal (Acp2), mRNA.	2.09943	1.47768	0.703848
Pdia4	Mus musculus protein disulfide isomerase associated 4 (Pdia4), mRNA.	2.51403	1.76949	0.703846
Snx21	Mus musculus sorting nexin family member 21 (Snx21), mRNA.	3.20798	2.25532	0.703034
Tax1bp3	Mus musculus Tax1 (human T-cell leukemia virus type I) binding protein 3 (Tax1bp3), mRNA.	2.12874	1.49485	0.702223
Mtif3	Mus musculus mitochondrial translational initiation factor 3 (Mtif3), nuclear gene encoding mitochondrial protein, mRNA.	2.58172	1.8025	0.698178
Elovl4	Mus musculus elongation of very long chain fatty acids (FEN1/Elo2, SUR4/Elo3, yeast)-like 4 (Elovl4), mRNA.	2.40883	1.68179	0.698177
Commd5	Mus musculus COMM domain containing 5 (Commd5), mRNA.	3.04547	2.12383	0.697373
Ywhaq	Mus musculus tyrosine 3-monooxygenase/tryptophan 5-monooxygenase activation protein, theta polypeptide (Ywhaq), mRNA.	2.16845	1.50873	0.695764
Tmem141	Mus musculus transmembrane protein 141 (Tmem141), mRNA. XM_979169	2.48515	1.72907	0.695761
BC031181	Mus musculus cDNA sequence BC031181 (BC031181), mRNA.	2.02324	1.40769	0.69576
Eef1d	Mus musculus eukaryotic translation elongation factor 1 delta (guanine nucleotide exchange protein) (Eef1d), transcript variant 1, mRNA.	3.27539	2.27626	0.694958
Grpel1	Mus musculus GrpE-like 1, mitochondrial (Grpel1), nuclear gene encoding mitochondrial protein, mRNA.	2.03731	1.41421	0.694156
Mrps10	Mus musculus mitochondrial ribosomal protein S10 (Mrps10), nuclear gene encoding mitochondrial protein, mRNA.	2.33216	1.61702	0.693357
Whsc2		2.00231	1.38191	0.690158
Ttc35	Mus musculus tetratricopeptide repeat domain 35 (Ttc35), mRNA.	2.31873	1.59107	0.686182
Wbscr22	Mus musculus Williams Beuren syndrome chromosome region 22 (Wbscr22), mRNA.	2.44246	1.67404	0.685391
Acads	Mus musculus acyl-Coenzyme A dehydrogenase, short chain (Acads), nuclear gene encoding mitochondrial protein, mRNA.	2.20636	1.50873	0.68381
Ifnab	Mus musculus interferon alpha B (Ifnab), mRNA.	2.13613	1.45734	0.682234
Sertad3	Mus musculus SERTA domain containing 3 (Sertad3), mRNA.	2.11893	1.44393	0.681443
Fads2		2.17096	1.47087	0.677521
Prkcdbp	Mus musculus protein kinase C, delta binding protein (Prkcdbp), mRNA.	2.76702	1.87471	0.677519
Prdx3		2.08734	1.41095	0.675956
Snrpf	PREDICTED: Mus musculus small nuclear ribonucleoprotein polypeptide F (Snrpf), mRNA.	2.9622	1.99538	0.673614
Ptges	Mus musculus prostaglandin E synthase (Ptges), mRNA.	2.12383	1.42734	0.672059
Rsph1	Mus musculus radial spoke head 1 homolog (Chlamydomonas) (Rsph1), mRNA.	2.1312	1.43065	0.671288
Ssbp1	Mus musculus single-stranded DNA binding protein 1 (Ssbp1), transcript variant 2, mRNA.	2.5403	1.70133	0.669736
Fbxo6	Mus musculus F-box protein 6 (Fbxo6), mRNA.	2.40327	1.60585	0.668194
Sod2		2.69136	1.79834	0.66819
Fbxo44	Mus musculus F-box protein 44 (Fbxo44), mRNA.	2.16845	1.44393	0.665881
Stx4a	Mus musculus syntaxin 4A (placental) (Stx4a), mRNA.	2.2868	1.51222	0.661282
Tubb2b	Mus musculus tubulin, beta 2b (Tubb2b), mRNA.	2.24752	1.4811	0.658993
Zfp386	Mus musculus zinc finger protein 386 (Kruppel-like) (Zfp386), transcript variant 2, mRNA.	2.45377	1.60956	0.655954
C1qtnf5	Mus musculus C1q and tumor necrosis factor related protein 5 (C1qtnf5), transcript variant 1, mRNA.	2.0209	1.32256	0.654441
Bola3	Mus musculus bolA-like 3 (E. coli) (Bola3), mRNA.	2.67277	1.74917	0.654441
Ghdc	Mus musculus GH3 domain containing (Ghdc), mRNA.	2.19365	1.43396	0.653687
Rpl13a	Mus musculus ribosomal protein L13a (Rpl13a), mRNA.	2.26577	1.47768	0.652176
Rps9	Mus musculus ribosomal protein S9 (Rps9), mRNA.	2.08012	1.3566	0.652174
Lcmt1	Mus musculus leucine carboxyl methyltransferase 1 (Lcmt1), mRNA.	2.31605	1.50873	0.651424
Tbcb	Mus musculus tubulin folding cofactor B (Tbcb), mRNA.	2.14107	1.39474	0.651422
Ctxn1	Mus musculus cortexin 1 (Ctxn1), mRNA.	2.11893	1.3692	0.646175
Sdc4	Mus musculus syndecan 4 (Sdc4), mRNA.	2.09459	1.35347	0.646174
Rab8a	Mus musculus RAB8A, member RAS oncogene family (Rab8a), mRNA.	2.69758	1.7411	0.64543
Ndrg3	Mus musculus N-myc downstream regulated gene 3 (Ndrg3), mRNA.	2.10186	1.34723	0.64097
2510002D24Rik	RIKEN cDNA 2510002D24	3.05605	1.94981	0.638016
Calr3	Mus musculus calreticulin 3 (Calr3), transcript variant 2, mRNA.	2.66044	1.68958	0.635075
2310011J03Rik	RIKEN cDNA 2310011J03 gene	3.00355	1.90528	0.634343
Lrrfip2		2.35381	1.47427	0.626333
Dhrs4	Mus musculus dehydrogenase/reductase (SDR family) member 4 (Dhrs4), transcript variant 1, mRNA.	2.07532	1.29235	0.622723
Vps72	Mus musculus vacuolar protein sorting 72 (yeast) (Vps72), mRNA.	2.09701	1.30134	0.620569
Prss23	Mus musculus protease, serine, 23 (Prss23), mRNA.	2.11648	1.31342	0.620568
D730003I15Rik		2.56685	1.59107	0.619853
AI413582	Mus musculus expressed sequence AI413582 (AI413582), mRNA.	2.05148	1.26284	0.615575
Zfp637	Mus musculus zinc finger protein 637 (Zfp637), mRNA.	2.51984	1.54756	0.61415
Irak3	Mus musculus interleukin-1 receptor-associated kinase 3 (Irak3), mRNA.	2.29209	1.40444	0.612733
Pxmp2	Mus musculus peroxisomal membrane protein 2 (Pxmp2), mRNA.	2.31605	1.41748	0.612025
Srr	Mus musculus serine racemase (Srr), mRNA.	2.12383	1.29834	0.61132
Tmem159	Mus musculus transmembrane protein 159 (Tmem159), mRNA.	2.54912	1.54399	0.605695
Smarcb1	Mus musculus SWI/SNF related, matrix associated, actin dependent regulator of chromatin, subfamily b, member 1 (Smarcb1), mRNA.	2.16845	1.31039	0.604298
Zxda	Mus musculus zinc finger, X-linked, duplicated A (Zxda), non-coding RNA.	2.03026	1.22547	0.603602
Tmed1	Mus musculus transmembrane emp24 domain containing 1 (Tmed1), mRNA.	2.33755	1.41095	0.603602
St6galnac6	Mus musculus ST6 (alpha-N-acetyl-neuraminyl-2,3-beta-galactosyl-1, 3)-N-acetylgalactosaminide alpha-2,6-sialyltransferase 6 (St6galnac6), transcript variant 1, mRNA.	2.38116	1.43727	0.603601
Cript	Mus musculus cysteine-rich PDZ-binding protein (Cript), mRNA.	2.27363	1.3692	0.602209
Ankrd40	Mus musculus ankyrin repeat domain 40 (Ankrd40), transcript variant 1, mRNA.	2.74791	1.65099	0.600817
Heatr3	Mus musculus HEAT repeat containing 3 (Heatr3), mRNA.	2.0586	1.23114	0.598047
Whsc1l1	Mus musculus Wolf-Hirschhorn syndrome candidate 1-like 1 (human) (Whsc1l1), transcript variant 1, mRNA.	2.72893	1.62826	0.596666
Itpripl1	inositol 1,4,5-triphosphate receptor interacting protein-like 1	2.02324	1.20581	0.59598
Eif1ad	Mus musculus eukaryotic translation initiation factor 1A domain containing (Eif1ad), mRNA.	2.37293	1.4012	0.590494
Mrps11	Mus musculus mitochondrial ribosomal protein S11 (Mrps11), mRNA.	3.3058	1.94981	0.589815
M6prbp1	Mus musculus mannose-6-phosphate receptor binding protein 1 (M6prbp1), mRNA.	2.44246	1.43727	0.588452
Cnpy2	Mus musculus canopy 2 homolog (zebrafish) (Cnpy2), mRNA.	2.92141	1.71317	0.586419
Echs1	Mus musculus enoyl Coenzyme A hydratase, short chain, 1, mitochondrial (Echs1), mRNA.	2.07292	1.21139	0.584388
4930455C21Rik		2.51693	1.46409	0.581697
Cyb5r3	Mus musculus cytochrome b5 reductase 3 (Cyb5r3), mRNA.	2.4312	1.40769	0.57901
Dgcr6	Mus musculus DiGeorge syndrome critical region gene 6 (Dgcr6), mRNA.	2.27626	1.31646	0.578343
Mpg	Mus musculus N-methylpurine-DNA glycosylase (Mpg), mRNA.	2.17598	1.25701	0.577675
Tmem167b	Mus musculus transmembrane protein 167B (Tmem167b), mRNA.	2.16345	1.24833	0.577009
Bok		2.02558	1.16205	0.573688
Ccdc28b	Mus musculus coiled coil domain containing 28B (Ccdc28b), mRNA.	2.01159	1.15136	0.572363
Pygo1		2.02558	1.15136	0.56841
Fam152b	Mus musculus family with sequence similarity 152, member B (Fam152b), mRNA.	2.13366	1.2086	0.566445
Rad23a	Mus musculus RAD23a homolog (S. cerevisiae) (Rad23a), mRNA.	3.16748	1.79419	0.566441
Gmds	Mus musculus GDP-mannose 4, 6-dehydratase (Gmds), mRNA.	2.05385	1.16205	0.565791
Gng2	Mus musculus guanine nucleotide binding protein (G protein), gamma 2 (Gng2), transcript variant 2, mRNA.	2.15846	1.21982	0.565134
Tpd52l1	Mus musculus tumor protein D52-like 1 (Tpd52l1), mRNA.	3.45815	1.94981	0.56383
Thoc3	Mus musculus THO complex 3 (Thoc3), mRNA.	2.34838	1.31951	0.561881
5730409G15Rik	Mus musculus RIKEN cDNA 5730409G15 gene (5730409G15Rik), mRNA.	2.08734	1.16743	0.559291
Polr1e	Mus musculus polymerase (RNA) I polypeptide E (Polr1e), mRNA.	2.63902	1.46747	0.556066
Alg11	Mus musculus asparagine-linked glycosylation 11 homolog (yeast, alpha-1,2-mannosyltransferase) (Alg11), mRNA.	2.10429	1.16743	0.554786
Mrpl2	Mus musculus mitochondrial ribosomal protein L2 (Mrpl2), nuclear gene encoding mitochondrial protein, mRNA.	2.82843	1.56555	0.553505
Cnp	Mus musculus 2',3'-cyclic nucleotide 3' phosphodiesterase (Cnp), mRNA.	2.21402	1.22264	0.552226
Thg1l	Mus musculus tRNA-histidine guanylyltransferase 1-like (S. cerevisiae) (Thg1l), mRNA.	3.2303	1.76949	0.547779
Hoxc10	Mus musculus homeo box C10 (Hoxc10), mRNA.	2.66044	1.45062	0.545256
Cisd1	Mus musculus CDGSH iron sulfur domain 1 (Cisd1), mRNA.	2.30537	1.25122	0.542742
Rtp4	Mus musculus receptor transporter protein 4 (Rtp4), mRNA.	2.08252	1.11987	0.537748
Cyp2j9	Mus musculus cytochrome P450, family 2, subfamily j, polypeptide 9 (Cyp2j9), mRNA.	2.55797	1.37237	0.536507
Mrps9	Mus musculus mitochondrial ribosomal protein S9 (Mrps9), mRNA.	2.2217	1.16743	0.525467
Txn2	Mus musculus thioredoxin 2 (Txn2), nuclear gene encoding mitochondrial protein, mRNA.	2.75745	1.44727	0.524858
Tspan31	Mus musculus tetraspanin 31 (Tspan31), mRNA.	2.01857	1.04972	0.520032
Bex2	Mus musculus brain expressed X-linked 2 (Bex2), mRNA.	2.62685	1.36604	0.52003
Elavl1	Mus musculus ELAV (embryonic lethal, abnormal vision, Drosophila)-like 1 (Hu antigen R) (Elavl1), mRNA.	2.19365	1.12506	0.512871
Aes		2.40605	1.23114	0.511685
Ascc1	Mus musculus activating signal cointegrator 1 complex subunit 1 (Ascc1), mRNA.	2.77022	1.41748	0.511685
St3gal1	Mus musculus ST3 beta-galactoside alpha-2,3-sialyltransferase 1 (St3gal1), mRNA.	2.1386	1.09177	0.510507
BC024659	PREDICTED: Mus musculus cDNA sequence BC024659 (BC024659), mRNA.	2.44528	1.2086	0.494258
Cap1	Mus musculus CAP, adenylate cyclase-associated protein 1 (yeast) (Cap1), mRNA.	2.32947	1.12766	0.484084
Glipr2	Mus musculus GLI pathogenesis-related 2 (Glipr2), mRNA.	2.10672	0.997692	0.473576
Ppp1r14b		2.8481	1.34102	0.470847
Mrpl55	Mus musculus mitochondrial ribosomal protein L55 (Mrpl55), mRNA.	2.03967	0.943874	0.462758
Tpi1	Mus musculus triosephosphate isomerase 1 (Tpi1), mRNA.	2.38392	1.10191	0.462226
Gm1815	PREDICTED: Mus musculus gene model 1815, (NCBI) (Gm1815), mRNA.	2.97248	1.37237	0.461692
0610012G03Rik	0610012G03Rik	2.18354	0.99539	0.455861
Tsc22d3	Mus musculus TSC22 domain family, member 3 (Tsc22d3), transcript variant 1, mRNA.	2.15348	0.981686	0.45586
Nenf	Mus musculus neuron derived neurotrophic factor (Nenf), mRNA.	2.19112	0.986233	0.450105
Ppib	Mus musculus peptidylprolyl isomerase B (Ppib), mRNA.	2.43964	1.08423	0.444422
Sfxn4	Mus musculus sideroflexin 4 (Sfxn4), mRNA.	2.45377	1.08423	0.441863
Apol9b	Mus musculus apolipoprotein L 9b (Apol9b), mRNA.	3.02793	1.25411	0.414181
Lsm12	Mus musculus LSM12 homolog (S. cerevisiae) (Lsm12), mRNA.	2.01391	0.827406	0.410846
Cxcl9	Mus musculus chemokine (C-X-C motif) ligand 9 (Cxcl9), mRNA.	2.39773	0.981686	0.409423
Chchd6	Mus musculus coiled-coil-helix-coiled-coil-helix domain containing 6 (Chchd6), mRNA.	2.14355	0.860551	0.401461
Prnpip1	Mus musculus prion protein interacting protein 1 (Prnpip1), mRNA.	2.48802	0.97041	0.390033
Mea1	Mus musculus male enhanced antigen 1 (Mea1), mRNA.	2.72893	1.04972	0.384664
Raet1c	Mus musculus retinoic acid early transcript gamma (Raet1c), mRNA.	2.24233	0.83702	0.373281
Tfpi	Mus musculus tissue factor pathway inhibitor (Tfpi), mRNA.	2.7384	0.937354	0.3423
B130065G19Rik		3.66802	1.14605	0.312444
Psd3	Mus musculus pleckstrin and Sec7 domain containing 3 (Psd3), transcript variant 2, mRNA.	2.39496	0.345478	0.144252
Bmx	Mus musculus BMX non-receptor tyrosine kinase (Bmx), mRNA.	2.08493	0.25	0.119908
